# Supplementary material for: A multi-scale comparison of modeled and observed seasonal methane cycles in northern wetlands
Source: Copernicus journal article supplement (doi:10.5194/bg-2016-167), 2016-05-09
Supplement: Supplementary file 1 [file bg-2016-167-supplement.pdf]

Supplement

**A multi-scale comparison of modeled and observed seasonal methane cycles in northern wetlands**

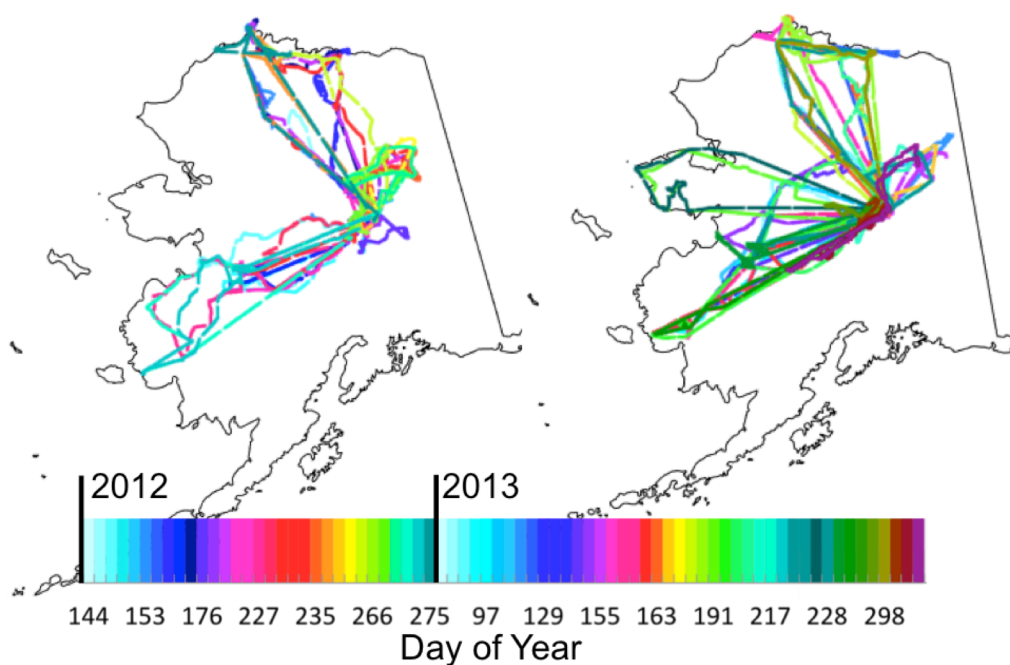

Fig. S1. Flight tracks with valid CH<sub>4</sub> mole fractions during the CARVE 2012 and 2013 campaigns. There were 31 flight days in 2012 and 43 flight days in 2013 (Supplement Table S2).

| Site Name              | Site Location (Lat, Lon) | Citation                           | Measurement Method | Data years            |
|------------------------|--------------------------|------------------------------------|--------------------|-----------------------|
| Ruoergai, China        | 32°47'N, 102°32'E        | Ding et al. (2004)                 | SC                 | 2001, 2002            |
| Mississippi, USA       | 34°24'N, 89°50'W         | Koh et al. (2009)                  | SC                 | 2005, 2006            |
| Michigan, USA          | 42°27'N, 84°01'W         | Shannon and White (1994)           | SC                 | 1991, 1992, 1993      |
| Minnesota, USA         | 47°32'N, 93°28'W         | Clement et al. (1995)              | SC                 | 1991, 1992            |
| Minnesota, USA         | 47°32'N, 93°28'W         | Dise(1993)                         | SC                 | 1988, 1989, 1990      |
| Boreas NSA-Fen, Canada | 55°55'N, 98°25'W         | Bubier et al. (1998)               | SC                 | 1994, 1996            |
| Salmisuo, Finland      | 62°47'N, 30°56'E         | Saarnio et al.( 1997)              | SC                 | 1993                  |
| Degeröe, Sweden        | 64°11'N, 19°33'E         | Granberg et al. (2001)             | SC                 | 1995, 1996, 1997      |
| Alaska, USA            | 64°52'N, 147°51'W        | Whalen and Reeburgh (1992)         | SC                 | 1987,1988, 1989, 1990 |
| Stordalen, Sweden      | 68°20'N, 19°03E          | Svensson et al. (1999)             | SC                 | 1974, 1994, 1995      |
| Boreas SSA-Fen, Canada | 53°48'N, 104°37'W        | Verma et al.(1998)                 | EC                 | 1994, 1995            |
| Stordalen, Sweden      | 68°20'N, 19°03E          | Jackowicz-Korczynski et al. (2010) | EC                 | 2006, 2007            |
| Alaska-BEO1, USA       | 71°17'N, 156°37'W        | Raz-Yaseef, N. (NGEE-Arctic)       | EC                 | 2012, 2013            |
| Alaska-BEO2, USA       | 71°17'N, 156°37'W        | Zona et al., (2016)                | EC                 | 2013, 2014            |
| Alaska-BES, USA        | 71°17'N, 156°36'W        | Zona et al., (2016)                | EC                 | 2013, 2014            |
| Alaska-CMDL, USA       | 71°19'N, 156°37'W        | Zona et al., (2016)                | EC                 | 2013, 2014            |
| Alaska-ATQ, USA        | 70°28'N, 157°25'W        | Zona et al., (2016)                | EC                 | 2013, 2014            |
| Alaska-IVO, USA        | 68°29'N, 155°45'W        | Zona et al., (2016)                | EC                 | 2013, 2014            |
| Alaska-FAI, USA        | 64°52'N, 147°51'W        | Iwata et al., (2015)               | EC                 | 2011, 2012, 2013      |
| Alaska-IMN, USA        | 68°37'N, 149°18'W        | EUSKIRCHEN, E. S. (UAF)            | EC                 | 2012, 2013, 2014      |

Table S1. Summary of the sites and measurements used in comparison with model prediction. SC: static chamber; EC: eddy covariance tower.

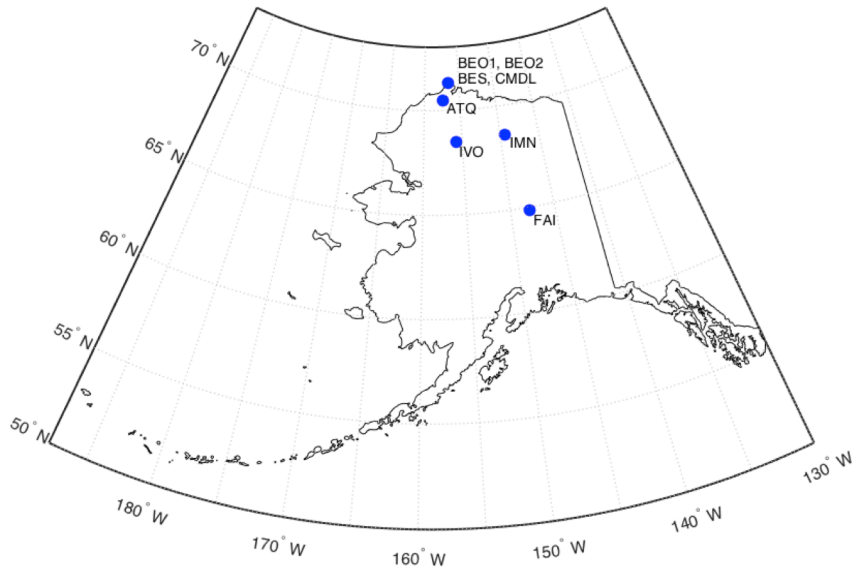

Fig. S2 The eight eddy covariance (EC) sites in Alaska

Table S2. The flight dates of CARVE measurements in 2012 and 2013

| <b>Year</b> | <b>Month</b> | <b>Dates</b>            |
|-------------|--------------|-------------------------|
| 2012        | May          | 23,24,27,28,30          |
|             | June         | 1,18,19,21,22,24        |
|             | July         | 17,22,24,25             |
|             | August       | 14,18,19,20,21,22,23    |
|             | September    | 17,18,19,21,22,23,24,26 |
|             | October      | 1                       |
| 2013        | April        | 2,3,4,5,6               |
|             | May          | 2,4,6,7,8,9,10,13       |
|             | June         | 2,3,6,7,8,9,11          |
|             | July         | 3,4,5,7,9,11,12         |
|             | August       | 2,3,4,7,11,12,13        |
|             | September    | 5,6,7,10,12             |
|             | October      | 24,25,26,27             |
