# Supplementary material for: A multi-scale comparison of modeled and observed seasonal methane cycles in northern wetlands
Source: Copernicus journal article supplement (doi:10.5194/bg-2016-167), 2016-05-09
Supplement: Supplementary file [file bg-2016-167-RC1-supplement.pdf]

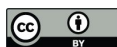

1     **A multi-scale comparison of modeled and observed seasonal methane**  
2                                            **cycles in northern wetlands**

3  
4     Xiyang Xu<sup>1</sup>, William J. Riley<sup>1</sup>, Charles D. Koven<sup>1</sup>, Dave P. Billesbach<sup>2</sup>, Rachel Y.-W.  
5     Chang<sup>3,4</sup>, Róisín Commane<sup>3</sup>, Eugénie S. Euskirchen<sup>5</sup>, Sean Hartery<sup>4</sup>, Yoshinobu  
6     Harazono<sup>6,7</sup>, Hiroki Iwata<sup>6,8</sup>, Kyle C. McDonald<sup>9,10</sup>, Charles E. Miller<sup>10</sup>, Walter C.  
7     Oechel<sup>11,12</sup>, Benjamin Poulter<sup>13</sup>, Naama Raz-Yaseef<sup>1</sup>, Colm Sweeney<sup>14,15</sup>, Margaret  
8     Torn<sup>1,16</sup>, Steven C. Wofsy<sup>3</sup>, Zhen Zhang<sup>15,17</sup>, Donatella Zona<sup>11,18</sup>

9  
10    <sup>1</sup>Earth Sciences Division, Lawrence Berkeley National Laboratory, Berkeley, California,  
11    USA;

12    <sup>2</sup>Biological System Engineering Department, University of Nebraska, Lincoln,  
13    Nebraska;

14    <sup>3</sup>School of Engineering and Applied Sciences, Harvard University, Cambridge,  
15    Massachusetts, USA;

16    <sup>4</sup>Department of Physics and Atmospheric Science, Dalhousie University, Halifax,  
17    Nova Scotia, Canada;

18    <sup>5</sup>Institute of Arctic Biology, University of Alaska Fairbanks, Fairbanks, Alaska, USA;

19    <sup>6</sup>International Arctic Research Center, University of Alaska Fairbanks, Fairbanks,  
20    Alaska, USA;

21    <sup>7</sup>Graduate School of Life and Environmental Sciences, Osaka Prefecture University,  
22    Sakai, Osaka, Japan;

23    <sup>8</sup>Department of Environmental Sciences, Faculty of Science, Shinshu University,  
24    Matsumoto, Nagano, Japan;

25    <sup>9</sup>Department of Earth and Atmospheric Sciences, CUNY Environmental Crossroads  
26    Initiative and NOAA-CREST Institute, The City College of New York, City University  
27    of New York, New York;

28    <sup>10</sup>Jet Propulsion Laboratory, California Institute of Technology, Pasadena, California,  
29    USA;

30    <sup>11</sup>Global Change Research Group, Department of Biology, San Diego State University,  
31    San Diego, California, USA;

32    <sup>12</sup>Department of Environment, Earth and Ecosystems, The Open University, Milton  
33    Keynes, U. K. MK7 6AA;

34    <sup>13</sup>Department of Ecology, Montana State University, Bozeman, MT 59717, USA;

35    <sup>14</sup>Cooperative Institute for Research in Environmental Sciences, University of Colorado,  
36    Boulder, CO, 80304 USA;

37    <sup>15</sup>NOAA Earth System Research Laboratory, Global Monitoring Division, Boulder, CO,  
38    USA;

39    <sup>16</sup>Energy and Resources Group, University of California-Berkeley, Berkeley,  
40    California, USA;

41    <sup>17</sup>Swiss Federal Research Institute WSL, Birmensdorf 8059, Switzerland;

42    <sup>18</sup>Department of Animal and Plant Sciences, University of Sheffield, Sheffield  
43    S102TN, United Kingdom.

44  
45    Correspondence to : Xiyang Xu (xxu@lbl.gov)

46



47 **Abstract:**   
48 Wetlands are the single largest global natural methane (CH<sub>4</sub>) source, and emissions   
49 between 50°N and 70°N latitude contribute 10-30% to this source. Predictive capability  
50 of northern wetland CH<sub>4</sub> emissions is still low due to limited site measurements, strong  
51 spatial and temporal variability in emissions, and complex hydrological and  
52 biogeochemical dynamics. To explore this issue, we compare wetland CH<sub>4</sub> emission  
53 predictions from the Community Land Model 4.5 (CLM4.5-BGC) with site to regional  
54 scale observations. A comparison of the CH<sub>4</sub> fluxes with eddy flux data highlighted  
55 needed changes to the model's estimate of aerenchyma area, which we implemented and  
56 tested. The model modification substantially reduced biases in CH<sub>4</sub> emissions when  
57 compared with CarbonTracker CH<sub>4</sub> predictions. CLM4.5 CH<sub>4</sub> emission predictions agree  
58 well with growing season (May-September) CarbonTracker Alaskan regional-level CH<sub>4</sub>  
59 predictions and site-level observations. However, CLM4.5 underestimated CH<sub>4</sub> emissions  
60 in the cold season (October-April). The monthly CH<sub>4</sub> mole fraction  enhancements due to  
61 wetland emissions are also assessed  using the WRF-STILT Lagrangian transport model  
62 coupled with daily emission priors from CLM4.5 and compared with aircraft CH<sub>4</sub> mole  
63 fraction measurements from the Carbon in Arctic Reservoirs Vulnerability Experiment  
64 (CARVE) campaign. Both the tower and aircraft analyses confirm the underestimate of  
65 cold season CH<sub>4</sub> emissions by CLM4.5. The greatest uncertainties in predicting the  
66 seasonal CH<sub>4</sub> cycle are from the wetland extent, cold season CH<sub>4</sub> production and CH<sub>4</sub>  
67 transport processes. We recommend more cold-season experimental studies in high  
68 latitude systems, which could improve understanding and parameterization of ecosystem  
69 structure and function during this period. Predicted CH<sub>4</sub> emissions remain uncertain, but  
70 we show here that benchmarking against observations across spatial scales can inform  
71 model structural and parameter improvements.  
72



## 73 1 Introduction

74 Natural wetlands are the single largest natural methane (CH<sub>4</sub>) source, contributing  
75 up to 34% of global CH<sub>4</sub> emissions (Kirschke et al., 2013). Between 1980 and 2009,  
76 estimated global annual CH<sub>4</sub> emissions from wetlands varied from 115 to 231 Tg CH<sub>4</sub> in  
77 top-down atmospheric inversion models and 169 to 284 Tg CH<sub>4</sub> in bottom-up process-  
78 based land models (Kirschke et al., 2013). Peat-rich bogs and fens lying between 50°N  
79 and 70°N constitute about half of the global wetland area, and release 10-30% of the total  
80 wetland CH<sub>4</sub> (Wania et al., 2010; Zhuang et al., 2004; Bergamaschi et al., 2009; Riley et  
81 al., 2011). Much of the northern wetland area is in the permafrost zone, which stores  
82 1035±150 Pg soil organic carbon for the 0-3 m soil depth (Hugelius et al., 2014). When  
83 permafrost soils thaw, CH<sub>4</sub> is produced under saturated conditions by anaerobic  
84 decomposition of organic carbon by methanogenic bacteria. Once CH<sub>4</sub> is produced, it can  
85 be oxidized by methanotrophic bacteria. CH<sub>4</sub> surface emissions occur through several  
86 transport pathways: aqueous and gaseous diffusion, ebullition, and aerenchyma diffusion  
87 and advection. At any point in the soil, the CH<sub>4</sub> concentration is governed by the balance  
88 between CH<sub>4</sub> production in anoxic zones, CH<sub>4</sub> consumption in oxic zones, transport, and  
89 atmospheric CH<sub>4</sub> diffusion into the soil.

90 Many interacting factors (e.g., temperature, thaw depth, soil moisture, depth of  
91 the water table, vegetation type) affect CH<sub>4</sub> production and emission. CH<sub>4</sub> production has  
92 a positive response to temperature increase (Van Hulzen et al., 1999; van Winden et al.,  
93 2012; Hommeltenberg et al., 2014) and laboratory incubations of soil samples from the  
94 active layer show that large variability of Q<sub>10</sub> values for CH<sub>4</sub> production (1.5 to 28,  
95 Segers et al., 1998) is related to site-specific peatland type and organic matter quality  
96 (Lupascu et al., 2012). CH<sub>4</sub> emissions also show positive temperature dependence above  
97 freezing. The temperature dependence of surface CH<sub>4</sub> emission is much stronger than that  
98 of respiration and photosynthesis, which indicates increases in both CH<sub>4</sub> emissions and  
99 the ratio of CH<sub>4</sub> to CO<sub>2</sub> emissions with seasonal increases in temperature (Yvon-  
100 Durocher et al., 2014). The positive temperature dependence of CH<sub>4</sub> emissions may only  
101 be valid when CH<sub>4</sub> oxidation is less sensitive to temperature (van Winden et al., 2012).  
102 The Q<sub>10</sub> value for CH<sub>4</sub> oxidation was reported to be 1.4 to 2.1 in northern peat soils  
103 (Dunfield et al., 1993). Strong oxidation temperature sensitivity can lead to decreased  
104 CH<sub>4</sub> surface emissions with rising temperature (Wang et al., 2014). The positive  
105 dependence of CH<sub>4</sub> emissions on soil temperature can be most significant in areas with  
106 sufficient soil moisture or a shallow water table (Roulet et al., 1992; Moosavi et al., 1996;  
107 Wickland et al., 1999). The dependency of CH<sub>4</sub> emissions on temperature can vanish at  
108 high temperature and low water table (Hommeltenberg et al., 2014). At low water table  
109 levels, large CH<sub>4</sub> oxidation can mask the CH<sub>4</sub> production temperature sensitivity in the  
110 net emissions. CH<sub>4</sub> production under sub-zero temperatures was reported in incubation  
111 experiments (Clein and Schimel, 1995; Brouchkov et al., 2003), however, the  
112 mechanisms that regulate CH<sub>4</sub> production under cold temperatures have not been  
113 clarified.

114 Soil water content exerts strong control on CH<sub>4</sub> emissions by affecting  
115 belowground carbon decomposition and root growth (Iversen et al., 2015). A lowered  
116 water table typically reduces CH<sub>4</sub> production and emission, because of a higher aerobic to  
117 anaerobic respiration ratio in the soil column and CH<sub>4</sub> oxidation during diffusive

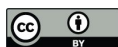

118 transport through the oxygen-rich surface layer (Whalen and Reeburgh, 1990). If CH<sub>4</sub>  
119 produced in anoxic zones (e.g., below the water table) is transported to the atmosphere  
120 through aerenchyma, the impact of methanotrophy on net CH<sub>4</sub> emissions is diminished  
121 (Bartlett et al., 1992; Torn and Chapin, 1993; King et al., 1998; Juutinen et al., 2003;  
122 McEwing et al., 2015). The reduced methanotrophic impacts vary with vascular species  
123 cover and root density and are more common in tall vegetation, because taller plants have  
124 more extensive root systems that enable more methanogenesis and pore water CH<sub>4</sub> to  
125 escape to the atmosphere (van Fischer et al., 2010). The methanotrophic impact on  
126 ebullition is minimized because bubbling-up of CH<sub>4</sub> from anoxic zones to the surface is  
127 very fast (Walter et al., 2006). The correlation between water table depth and CH<sub>4</sub>  
128 emission can be very weak if the water table drops in an already oxic surface layer  
129 (Sturtevant et al., 2012).

130 The seasonal cycle of CH<sub>4</sub> emissions and their physical controls are strongly  
131 controlled by the freeze-thaw cycle in northern wetlands, and its regulation of wetland  
132 extent. The northern wetland area retrieved from the 19- and 37-GHz passive microwave  
133 Special Sensor Microwave/Image (SSM/I) brightness temperature database shows that  
134 maximum inundation is usually observed during July, August, and September in north  
135 America (48°N-68°N) and between June and September in northern Eurasia (Mialon et  
136 al., 2005). The inundation dynamics retrieved from SSM/I and ISCCP observations, ERS  
137 scatterometer responses, and AVHRR visible and near-infrared reflectance also show that  
138 maximum inundation occurs in July and August in northern boreal regions (55°N-70°N)  
139 (Prigent et al., 2007). The inferred wetland extent increases rapidly during the spring  
140 thaw period and shrinks again during the fall freeze period; though it is unclear at large  
141 scales how much of this seasonal cycle is due to changes in the areal fraction of land in  
142 which water ponds at the surface versus changes in the phase of that water. The  
143 interannual variability of high-latitude summer wetland extent is very small. Larger  
144 interannual variability during the intermediate seasons arises from the large variability of  
145 the timing and extent of snowmelt and accumulation (Mialon et al., 2005). For boreal  
146 bogs north to 50°N, the variation in wetland area contributed about 30% to the annual  
147 emissions and can explain the interannual variation in regional CH<sub>4</sub> emissions (Ringeval  
148 et al., 2010).

149 Site measurements have shown great variability in seasonal CH<sub>4</sub> emissions  
150 (Wilson et al., 1989; Mastepanov et al., 2008; 2013; Zona et al., 2016). In the late fall to  
151 winter, the surface water or shallow peat zone are frozen, and CH<sub>4</sub> produced below the  
152 frozen layer can be trapped. Only a small portion of the trapped CH<sub>4</sub> is oxidized because  
153 of low oxygen concentrations below the frozen layer (Mastepanov et al., 2008). Observed  
154 CH<sub>4</sub> emissions during spring thaw are highly variable and contribute substantially to total  
155 annual emissions. CH<sub>4</sub> fluxes during the spring thaw period contributed 11% to the  
156 annual budget over an aapa mire in Finnish Lapland (Hargreaves et al., 2001). The  
157 emission amounts can be 24% of the total annual emissions during the spring period after  
158 snowmelt next to an open pool in Caribou Bog, Maine, while the proportion can be as  
159 high as 77% in the adjacent upland area (Comas et al., 2008). In the non-inundated  
160 upland tundra, the cold season (September to May) emissions account for more than 50%  
161 of the annual CH<sub>4</sub> emissions (Zona et al., 2016). Although wetlands can contribute a  
162 large proportion of annual CH<sub>4</sub> emissions during the cold season, the seasonal peak of  
163 CH<sub>4</sub> emissions is usually observed in the summer (Pickett-Heaps et al., 2011; Zona et al.,



164 2016). A transport model combined with flight measurements showed the peak CH<sub>4</sub>  
 165 emission to be in July-August in the Hudson Bay Lowlands (Pickett-Heaps et al., 2011).  
 166 Although the recorded emission pulses during spring thaw and late fall (Song et al., 2012;  
 167 Tokida et al., 2007; Rinne et al., 2007; Mastepanov et al., 2008; 2013) may be more  
 168 localized and of minor importance to annual emissions (Chang et al., 2014; Rinne et al.,  
 169 2007), the pulses indicates the complexity and heterogeneity in the seasonal CH<sub>4</sub> cycle.

170 Many modeling studies have shown that there is large uncertainty in predictions  
 171 of spatial patterns of CH<sub>4</sub> emissions from natural wetlands at the regional and global  
 172 scales (Melton et al., 2013; Bohn et al., 2015). This uncertainty can be roughly split into  
 173 poor knowledge of water table and soil moisture dynamics versus poor knowledge of  
 174 CH<sub>4</sub> fluxes per unit area of land with a given water table depth or soil moisture state; both  
 175 contribute substantially to the overall uncertainty. One approach to reducing this overall  
 176 uncertainty is to focus on the seasonal cycles of CH<sub>4</sub> emissions at the site scale (where  
 177 inundation dynamics can be more easily constrained) versus at larger scales to ask  
 178 whether model predictions and errors are consistent across these scales. The temporal  
 179 dynamics of CH<sub>4</sub> emissions over the season cannot be ignored when calculating long-  
 180 term CH<sub>4</sub> budgets (Morin et al., 2014). To investigate the seasonal cycle of CH<sub>4</sub>  
 181 emissions in northern wetlands and the underlying processes in a climate model context,  
 182 we evaluated and modified the CH<sub>4</sub> biogeochemistry module in the Community Land  
 183 Model (CLM 4.5). Seasonal cycles of CH<sub>4</sub> emissions in Alaskan wetlands are analyzed  
 184 based on the modified model predictions, CH<sub>4</sub> emission measurements at high-latitude  
 185 sites, CarbonTracker CH<sub>4</sub> emission estimates, and atmospheric inversion estimates of  
 186 surface CH<sub>4</sub> emissions from data collected in the Carbon in Arctic Reservoirs  
 187 Vulnerability Experiment (CARVE).

## 188 2 Data and Methods

### 189 2.1 Models description

#### 190 2.1.1 CH<sub>4</sub> model in CLM4.5-BGC

191 The CH<sub>4</sub> biogeochemistry model used here (CLM4Me; Riley et al. (2011)) has  
 192 been coupled to the revised land model CLM4.5, which includes numerous changes to  
 193 vegetation, soil biogeochemistry, and hydrology from the CLM4.0 in which CLM4Me  
 194 was originally developed. CLM4Me includes representation of CH<sub>4</sub> production,  
 195 oxidation, and transport through the soil column. Transport includes multiple pathways:  
 196 aerenchyma transport, ebullition, and aqueous and gaseous diffusion. Aerenchyma is the  
 197 most efficient pathway for gas exchange between the soil and atmosphere in wetlands or  
 198 aquatic environments, through which atmosphere O<sub>2</sub> is applied to roots and the  
 199 rhizosphere while CH<sub>4</sub> is removed from the soil to shoots and the atmosphere. In  
 200 CLM4Me, aerenchyma transport is parameterized as gaseous diffusion in response to a  
 201 concentration gradient between the soil layer ( $z$ ) and the atmosphere ( $a$ ) as:

202 

203 
$$A = \frac{C(z) - C_a}{\frac{rLz}{DpT\rho_r} + r_a}, \quad (1)$$



204 where  $D$  ( $\text{m}^2 \text{s}^{-1}$ ) is the free gas diffusion coefficient,  $C(z)$  ( $\text{mol m}^{-3}$ ) is the gaseous  
 205 concentration at depth  $z$ ,  $r_L$  is the ratio of root length to depth,  $p$  (-) is porosity;  $T$  ( $\text{m}^2 \text{m}^{-2}$ )  
 206 is specific aerenchyma area,  $r_a$  ( $\text{s m}^{-1}$ ) is the aerodynamic distance between the surface  
 207 and the atmospheric reference height, and  $r_r$  (-) is the root fraction in the soil layer. The  
 208 aerenchyma area  $T$  is seasonally varying with phenology  $S$  (described below):

$$209 \quad T = \frac{f_N N_a S}{0.22} \pi R^2, \quad (2)$$

211 where  $N_a$  ( $\text{mol m}^{-2} \text{s}^{-1}$ ) is annual net primary production (NPP),  $R$  ( $2.9 \times 10^{-3} \text{ m}$ ) is the  
 212 aerenchyma radius,  $f_N$  is the belowground fraction of current NPP, and the factor 0.22 is  
 213 the amount of C per tiller. The dimensionless term  $S$  is included in CLM4Me to capture  
 214 seasonal cycles of aerenchymous tissues. In the absence of data on phenology of  
 215 aerenchyma,  $S$  was originally taken as the leaf area index (LAI). As discussed below,  
 216 however, this assumption leads to seasonal cycle  $\text{CH}_4$  emission biases.

218 The  $\text{CH}_4$  transport through aerenchyma is most sensitive to aerenchyma area in  
 219 saturated conditions, and decreases with increasing aerenchyma area, because increased  
 220  $\text{O}_2$  fluxes through aerenchyma cause more  $\text{CH}_4$  oxidation in the rhizosphere (Riley et al.,  
 221 2011). Meng et al. (2012) tested plant functional type (pft)-specific fine root carbon ( $C_{FR}$ )  
 222 as a proxy of aerenchyma area and found that aerenchyma area dependence on  $C_{FR}$  leads  
 223 to about 39% increases in global annual  $\text{CH}_4$  emissions. In Meng et al., (2012)'s study, an  
 224 early spring spike in  $\text{CH}_4$  emission through aerenchyma transport was shown at a  
 225 Michigan site in both LAI and  $C_{FR}$  based aerenchyma area. Our analysis shows that the  
 226 simulated  $\text{CH}_4$  burst through aerenchyma transport during spring thaw is very common in  
 227 areas experiencing winter dormancy. In CLM4Me,  $\text{CH}_4$  production is proportional to grid  
 228 cell-averaged heterotrophic respiration (HR) from soil and litter, adjusted by soil  
 229 temperature, pH, redox potential, and variation of seasonal inundation fraction. In the  
 230 model,  $\text{CH}_4$  production starts when the soil temperature is above the freezing point.  
 231 However, CLM4.5 LAI lags behind the primary thaw day, which results in a very low  
 232 aerenchyma area and thus low aerenchyma transport of  $\text{O}_2$  into the soil during spring  
 233 thaw period. Only a very small portion of the  $\text{CH}_4$  produced in the soil column is  
 234 oxidized, allowing a large fraction of  $\text{CH}_4$  to be transported to the surface by aerenchyma.  
 235 The low oxidation rate also occurs when aerenchyma area is calculated with  $C_{FR}$ .

236 The uncertainty in representing the seasonality of aerenchyma area is due to (1)  
 237 poor current understanding of root dynamics and their control on aerenchyma area and (2)  
 238 scant relevant observations. In tundra, the aboveground production is often not a good  
 239 proxy for belowground production, because the soil temperature peaks later in the  
 240 growing season than solar irradiance (Sullivan and Welker, 2005; Sloan, 2011). Further,  
 241 root dynamics are strongly dependent on species. Root growth of *Eriophorum*  
 242 *angustifolium* may not be delayed when soil temperature is near  $0^\circ\text{C}$  (Chapin, 1974;  
 243 Billington et al., 1977), while *Dupontia Fischeri* produces many fewer root tips at these low  
 244 temperatures. In *Eriophorum vaginatum*, fine root growth is lagged significantly behind  
 245 the aboveground spring growth flush (Kummerow and Russell, 1980).

246 To eliminate the possible bias in the seasonal variation of roots and the extremely





247 low oxidation rate which caused CLM4Me to predict a large inundated area CH<sub>4</sub> burst  
248 from inundated areas during the spring thaw, we modified the model parameter  $S$  to be  
249 constant, which is used in the aerenchyma area estimation. We constrained  $S$  using global  
250 total CH<sub>4</sub> emissions estimated by top-down and bottom-up simulations during 2000–2009  
251 (Kirschke et al., 2013) and site-level measurements. We exclude the CH<sub>4</sub> emission from  
252 non-inundated area for the analysis of seasonal dynamics because the model shows very  
253 small seasonal contribution of CH<sub>4</sub> emission from non-inundated areas globally (Fig. 1).  
254 This CH<sub>4</sub> emission pulse from the non-inundated area, which may be related to soil  
255 moisture anomalies during spring thaw, has not been experimentally validated, but can  
256 lead to large biases in simulated CH<sub>4</sub> emissions from northern high latitudes (>50°N) in  
257 May and June (Fig. 1a and 1b). This simplification of the model produced seasonal cycles  
258 that did not contain the large springtime CH<sub>4</sub> emission bursts, and we therefore used this  
259 modified version for all experiments here.

260 The default method for calculating inundation fraction ( $F_{def}$ ) remains the same as  
261 described in Riley et al. (2011), which applied a simple inversion model to represent the  
262 spatial inundation:

$$264 \quad F_{def} = p_1 e^{-z_w/p_2} + p_3 Q_r, \quad (3)$$

265

266 The three parameters ( $p_1, p_2, p_3$ ) are optimized with the inundation map by Prigent et al.  
267 (2007).  $z_w$  is simulated water table depth (m) and  $Q_r$  is surface runoff (mm s<sup>-1</sup>). We also  
268 applied an estimate of inundation fraction  $F_{S+G}$  (Poulter et al., In Review) derived from  
269 seasonal cycle of inundation fraction from the Surface Water Microwave Product Series  
270 Version 2.0 (SWAMPS, Schroeder et al., 2015) developed at the NASA Jet Propulsion  
271 Laboratory with the Global Lakes and Wetlands Dataset (GLWD, Lehner and Doll, 2004)  
272 to discuss the potential uncertainties in CH<sub>4</sub> emissions caused by wetland area.

273 Our model is driven by half-degree CRUNCEP V5 6-Hourly Atmospheric  
274 Forcing dataset (1901–2013) (<http://dods.extra.cea.fr/data/p529viov/cruncep/readme.htm>).  
275 Monthly wetland CH<sub>4</sub> emissions are simulated between the year 2000 and 2012 during  
276 which  $F_{S+G}$  is available. The monthly CH<sub>4</sub> emissions in half-degree resolution are  
277 regridded to 1°×1° and averaged longitudinally to compare with CarbonTracker predicted  
278 CH<sub>4</sub> fluxes. Daily wetland CH<sub>4</sub> emissions are simulated for year 2012 and 2013 to  
279 calculate the atmospheric enhancements of CH<sub>4</sub> due to modeled surface emissions.

## 280 2.1.2 WRF-STILT modeling of CH<sub>4</sub> transport

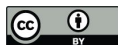

281 We simulate the atmospheric CH<sub>4</sub> mole fraction enhancements due to wetland  
282 emissions by combining the CLM4.5 predicted daily surface emissions with the land  
283 surface influences (“footprint”) calculated by the Weather Research and Forecasting-  
284 Stochastic Time-Inverted Lagrangian Transport (WRF-STILT) model (Henderson et al.;  
285 2015). WRF-STILT estimates the upwind surface influence along the flight track of the  
286 CARVE aircraft by releasing 500 particles at the point of flight measurement and  
287 allowing them to stochastically disperse in reverse time over 10 days (Henderson et al.,  
288 2015). The resolution of the resulting footprint sensitivity used in this study  
289 is 0.5 °×0.5°, covering 30-90°N, circumpolar. However, we assume that CH<sub>4</sub>  
290 transported from areas outside of Alaska are most likely mixed thoroughly in the  
291 atmosphere before they reach Alaska, and therefore only contribute to the background  
292 abundance of CH<sub>4</sub>.

## 293 2.2 Measurements of CH<sub>4</sub>

### 294 2.2.1 Site-Scale Observations

295 We compare CLM4.5 CH<sub>4</sub> emission predictions with data obtained from  
296 published studies and recent measurements of northern hemisphere static chamber (SC)  
297 measurements at 10 sites and eddy covariance (EC) measurements at 10 sites, of which 8  
298 are in Alaska (Supplement Table S1). The eddy covariance measurements in Alaska (Fig.  
299 S2) are obtained at the Barrow Environmental Observatory (BEO1) tower operated by the  
300 Next Generation Ecosystem Experiment (NGEE)-Arctic group; Barrow Environmental  
301 Observatory tower (BEO2), Biocomplexity Experiment South (BES) tower, Climate  
302 Monitoring and Diagnostics Laboratory (CMDL) tower, Atkasuk (ATQ) tower and  
303 Ivotuk (IVO) tower operated by Global Change Research Group at San Diego State  
304 University (Zona et al., 2016); tower in Fairbanks (FAI, Iwata et al., 2015) operated by  
305 International Arctic Research Center, the University of Alaska Fairbanks; and tower at  
306 the Innvait Creek watershed (IMN, Euskirchen et al., 2012). Monthly means are  
307 calculated across each observational record to compare to predicted mean seasonal CH<sub>4</sub>  
308 cycle. We discarded the monthly mean if the number of valid measurement days is less  
309 than half a month.

### 310 2.2.2 Comparisons to Airborne Measurements

311 The regionally integrated CH<sub>4</sub> mole fraction enhancements over Alaska were  
312 calculated from the CH<sub>4</sub> mole fractions measured by NOAA and Harvard Picarro  
313 spectrometers aboard a NASA C-23B aircraft (N430NA) during CARVE aircraft flights  
314 (Chang et al., 2014). The Harvard CH<sub>4</sub> measurements were gap filled with the NOAA  
315 CH<sub>4</sub> measurements to create a continuous 5-s time series. The flight measurements were  
316 conducted on selected days from May to September in 2012 and April to October in 2013  
317 during the Carbon in Arctic Reservoirs Vulnerability Experiment (CARVE) campaign,  
318 for a total of 31 flight days in 2012 and 43 flight days in 2013 (Fig. S1 and Table S2).  
319 The measurements of CH<sub>4</sub> with concurrent CO mole fractions above 150 ppb are  
320 excluded to remove possible CH<sub>4</sub> production from biomass burning. In Alaska,  
321 atmospheric boundary layer depth is in the range of 1100-1600 m above ground level  
322 (agl) during April and October according to COSMIC satellite and Radiosonde data



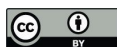

323 (Chan and Wood, 2013). We assume that the observed concentration fluctuations below  
324 500m agl can be used to infer the variation of surface CH<sub>4</sub> fluxes; the measurements  
325 above 1600 m agl are used to infer background mole fraction of CH<sub>4</sub>. The monthly mean  
326 enhancements in observed atmospheric CH<sub>4</sub> mole fraction is compared to that estimated  
327 from the CLM4.5 CH<sub>4</sub> enhancements.

### 328 2.2.3 Comparisons to Global-Scale Inversions

329 To compare our methane emissions with global and regional scale inversions, we  
330 use monthly regional CH<sub>4</sub> emissions predicted by CarbonTracker (Peters et al., 2007;  
331 Bruhwiler et al., 2014) at 1°×1° resolution. In CarbonTracker estimates, the natural CH<sub>4</sub>  
332 emissions correspond to wetlands, soils, oceans, insects, and wild animals. To examine  
333 the land CH<sub>4</sub> emissions only, we apply the CLM land mask to exclude the inferred  
334 CarbonTracker CH<sub>4</sub> emission from the ocean surface. CarbonTracker CH<sub>4</sub> estimates are  
335 available from January 2000 through December 2010; we therefore limit comparisons  
336 against the CLM4.5 predictions to this period.

## 337 3 Results and Discussion

### 338 3.1 Model constraints and comparison with observations

339 We assessed the sensitivity of the modeled CH<sub>4</sub> fluxes to parametric uncertainty  
340 in the constant dimensionless factor  $S$ , as described in the Methods.  $S$  has a direct effect  
341 on the magnitude of modeled CH<sub>4</sub> emissions via its control of oxygen diffusion through  
342 the soil column and thus CH<sub>4</sub> oxidation. When  $S = LAI$ , the very low  $LAI$  in the spring  
343 thaw period leads to low oxidation and consequently overestimated CH<sub>4</sub> net emissions.  
344 During the growing season, the model overestimates  $LAI$  at high latitude (Tian et al.,  
345 2004) leading to high oxidation and consequently underestimated net CH<sub>4</sub> emissions (Fig.  
346 1e and f). However, few observations of aerenchymous tissue biomass are available to  
347 provide an *a priori* constraint to this value. Our goal here is to use a reasonable value of  
348 this parameter, not to fully characterize the uncertainty of the parameter choice on CH<sub>4</sub>  
349 emissions.

350 Based on a comparison of the globally integrated CH<sub>4</sub> flux with other global  
351 estimates, we choose  $S=4$ , which resulted in an estimated annual total CH<sub>4</sub> emission of  
352 228 [Inter-annual Variability (IAV): 221- 239] Tg CH<sub>4</sub> yr<sup>-1</sup> with  $F_{def}$  and 206 [IAV: 200-  
353 217] Tg CH<sub>4</sub> yr<sup>-1</sup> with  $F_{S+G}$  during the period 2000 - 2009. The top-down and bottom-up  
354 models have estimates of CH<sub>4</sub> emissions from natural wetlands of 175 [IAV: 142-208]  
355 Tg CH<sub>4</sub> yr<sup>-1</sup> and 217 [IAV: 177-284] Tg CH<sub>4</sub> yr<sup>-1</sup>, respectively, during the same period  
356 (Kirschke et al., 2013). The mean CH<sub>4</sub> emission predicted by CLM4.5 is about 42 Tg  
357 CH<sub>4</sub> yr<sup>-1</sup> lower than the original CLM4Me prediction (annual mean of 270 Tg CH<sub>4</sub> yr<sup>-1</sup>  
358 from 1948 to 1972), but slightly larger than the mean value from other bottom-up and  
359 top-down models. The disagreement between studies with different models is as large as  
360 66% (Kirschke et al., 2013), hence our estimate is well within the range of values from  
361 top-down constraints and underscores the uncertainty involved in using such a constraint  
362 in inferring model parameters.



363 Compared with CarbonTracker predictions, CLM's biases of underestimated  
364 growing-season CH<sub>4</sub> emissions north of 56°N and biases of overestimated CH<sub>4</sub> emissions  
365 in 2-53°N and 34-56°S are reduced when using  $S = 4$  compared to the default  
366 parameterization (Fig. 1d and f). For the global zonal mean, the CLM CH<sub>4</sub> prediction  
367 biases are reduced with  $F_{S+G}$  (RMSE=25 ng C m<sup>-2</sup> s<sup>-1</sup>) compared with  $F_{def}$  (RMSE = 31 ng  
368 C m<sup>-2</sup> s<sup>-1</sup>). With  $F_{S+G}$ , the biases are much reduced in 2-50°N and 30-58°S. However,  
369 negative CH<sub>4</sub> emission biases in the tropics remain (Fig. 1c and 1e). The differences in  
370 CH<sub>4</sub> emissions using SWAMPS-GLWD and CLM4.5 predicted inundation fraction  
371 implies that the prediction uncertainties are not only from the biogeochemical  
372 parameterization but also from the wetland extent, consistent with several recent model  
373 inter-comparison analyses (Melton et al., 2013; Bohn et al., 2015). In Alaska, the  
374 predicted annual CH<sub>4</sub> emissions between 2000 and 2010 are 1.47±0.20, 1.58±0.07, and  
375 1.12±0.05 Tg CH<sub>4</sub> yr<sup>-1</sup> for CarbonTracker, CLM4.5 with  $F_{S+G}$ , and CLM4.5 with  $F_{def}$ ,  
376 respectively. Although our predicted annual emissions are reasonable compared with  
377 most land surface model predictions, the May to September predictions are about 50-70%  
378 of the emissions estimated using an atmospheric inversion based on CARVE  
379 observations of 2.1± 0.5 Tg CH<sub>4</sub> yr<sup>-1</sup> (Chang et al., 2014).

## 380 3.2 Seasonal CH<sub>4</sub> Cycle

### 381 3.2.1 Site level comparison

382 The mean seasonal cycle of predicted CH<sub>4</sub> emissions is calculated from the 2000-  
383 2012 monthly mean in a 0.5°×0.5° grid cell where site measurements exist, while the  
384 seasonal cycle of site measurements is calculated for the measurement years. If multiple  
385 measurement sites and multiple measurement years with the same measurement method  
386 (SC or EC) exist within a given grid cell, the observations are averaged to create a grid  
387 cell mean value that can be directly compared with the modeled value for that grid cell.  
388 In the 10 site-level static chamber measurements at saturated sites (Fig. 2a-l), the  
389 seasonality is well predicted by the revised CLM4.5 CH<sub>4</sub> model at most sites.  
390 Measurements and predictions show the peak emission month to be July or August at  
391 most sites, except the site in Michigan, USA (Fig. 2f) where the model successfully  
392 predicted the peak emissions in May. However, the model misrepresents the seasonality  
393 at the Stordalen (Sweden) (Fig. 2a and k) and the Boreas NSA (Canada) (Fig. 2i) site. At  
394 the Ruoergai (China) (Fig. 2j), the model does not show a strong seasonal variation from  
395 April to September, and notably underestimates the growing season CH<sub>4</sub> emissions. The  
396 underestimation of growing season emissions is also found in the Minnesota (USA),  
397 Michigan (USA), and Boreas NSA (Canada) sites (Fig. 2d, 2e, 2f and 2h). The sites  
398 experiencing  frost with valid measurements in the cold season demonstrate the  
399 underestimation of CLM4.5 CH<sub>4</sub> emission predictions during this period (Fig. 2a, 2d, 2e  
400 and 2i).

401 The eddy covariance measurements from four sites, the BEO1, BEO2, BES, and  
402 CMDL sites are in the same model grid cell, therefore, the measurements in these four  
403 sites are aggregated to the same grid cell as that of Alaska (Fig. 2m). As the footprints of  
404 the measurement towers were not estimated, all the modeled CH<sub>4</sub> emissions at eddy  
405 covariance sites are weighted with an observationally estimated seasonal-invariant range



406 of inundation fraction: Stordalen: 80-100%; Boreas SSA: 50-90%; Barrow: 60-100%;  
 407 Atqasuk: 10-30%; Ivotuk: 5-25%; Fairbanks: 0.5-2.5% and IMN: 5-25%. Measurements  
 408 at the Stordalen site (Fig. 2a and k) show very different CH<sub>4</sub> emission patterns in  
 409 seasonality and magnitude for different years and measurement methods. The model  
 410 significantly underestimates CH<sub>4</sub> emissions even with the maximum fraction of  
 411 inundation in Stordalen (Fig. 2k). In comparison with the static chamber measurements at  
 412 Alaska (Fig. 2h), the model predicts a much shorter CH<sub>4</sub> emission season at the non-  
 413 inundated sites (Fig. 2m-q). The estimated CH<sub>4</sub> emissions begin in April at Ivotuk,  
 414 Fairbank, and Imnavait. At the northern sites, Barrow and Atqasuk, the estimated CH<sub>4</sub>  
 415 emissions begin in May. In the short emission season, the model underestimates CH<sub>4</sub>  
 416 emissions in June and July at Barrow and Atqasuk and in July at Imnavait, even with the  
 417 maximum inundation estimation. While the cold-season measurements at Barrow,  
 418 Atqasuk, and Ivotuk show large CH<sub>4</sub> emissions from October to April in agreement with  
 419 the static chamber measurements at the sites with cold season soil frost, predicted CH<sub>4</sub>  
 420 emissions end in October at all the Alaskan sites. The largest monthly mean emissions in  
 421 Alaska cold season are 24.8±9.0 mg CH<sub>4</sub> m<sup>-2</sup> day<sup>-1</sup> measured in October at Ivotuk.

422 A number of factors affect the correspondence between site-level CH<sub>4</sub> emission  
 423 observations and CLM predictions (Fig. 2), including: (1) we used reanalysis climate  
 424 forcing data which may lead to some of the differences with the site observations; (2) we  
 425 used the model's default surface characterization, which is unlikely to exactly match the  
 426 actual vegetation and soil properties; (3) the spatial and temporal coverage of the site data  
 427 are sparse; (4) the inter-annual variation of wetland CH<sub>4</sub> emission can be significant; (5)  
 428 the method of measuring CH<sub>4</sub> fluxes varied from site to site and (6) the seasonal fraction  
 429 of inundation in eddy covariance tower footprint is unknown. We also expect differences  
 430 between our CLM4.5 predictions and those reported in Riley et al., (2011) at the site-  
 431 level comparison, because: (1) simulations in this study were done at higher resolution  
 432 (0.5°x0.5°) than those in Riley et al. (2011) (1.9° x2.5°); (2) the current simulations are  
 433 forced by CRUNCEP climate, while Riley et al., (2011) simulations were forced with  
 434 Qian et al., (2006) climate; (3) the *S* parameter is changed, as discussed above; and (4)  
 435 the overall water and carbon cycles of CLM changed substantially between CLM4.0 and  
 436 CLM4.5 (Koven et al., 2013). The site-level discrepancies occur because of the  
 437 uncertainties discussed above and those arising from other parameters (Riley et al., 2011),  
 438 including: Q<sub>10</sub> of CH<sub>4</sub> production and oxidation, CH<sub>4</sub> half-saturation oxidation coefficient,  
 439 O<sub>2</sub> half-saturation oxidation coefficient, maximum oxidation rate of CH<sub>4</sub> oxidation, and  
 440 impact of pH and redox potential on CH<sub>4</sub> production.

### 441 3.2.2 Regional CH<sub>4</sub> emissions comparison

442 The biases between CLM4.5 and CarbonTracker CH<sub>4</sub> emissions vary with latitude  
 443 (Fig. 3). The aggregated  $F_{S+G}$  led to larger CH<sub>4</sub> emission biases in Alaska (RMSE = 4 mg  
 444 CH<sub>4</sub> m<sup>-2</sup> day<sup>-1</sup>) compared to the CH<sub>4</sub> prediction with  $F_{def}$  (RMSE = 3 mg CH<sub>4</sub> m<sup>-2</sup> day<sup>-1</sup>),  
 445 although it led to smaller global CH<sub>4</sub> emission biases. In Alaska between 58-66°N during  
 446 the growing season, CLM4.5 using  $F_{def}$  has good agreement with CarbonTracker  
 447 predictions. In this region, CH<sub>4</sub> emissions begin in May, peak in July and August,  
 448 and end in October (Fig. 4). In May and June, CarbonTracker shows a weak CH<sub>4</sub> sink (~0[10<sup>-1</sup>  
 449 -1] ng C m<sup>-2</sup> s<sup>-1</sup>) in contrast to a CLM4.5 predicted weak CH<sub>4</sub> source (~0[1] ng C m<sup>-2</sup> s<sup>-1</sup>)



450 with  $F_{def}$  and stronger  $\text{CH}_4$  source ( $\sim 10^1$  ng C m<sup>-2</sup> s<sup>-1</sup>) with  $F_{S+G}$  in the interior region  
451 of Alaska (Interior Alaska) between 63°N–66°N. We hypothesize that this discrepancy  
452 occurs because of the difference in the two wetland datasets and the accounting of  $\text{CH}_4$   
453 emissions from the non-inundated areas in CarbonTracker. Net  $\text{CH}_4$  consumption occurs  
454 at dry sites where oxygen is available in the top soil layers (Wickland et al., 1999);  
455 however,  $\text{CH}_4$  fluxes from the non-inundated areas which could be substantial (Zona et  
456 al., 2016) are excluded in CLM4.5 predictions shown in Fig. 3, as described in Methods.  
457 Interior Alaska has a highly continental climate with warm and relatively dry summers  
458 and extremely cold winters. The weak  $\text{CH}_4$  source in the dry summer is thus caused by a  
459 reduced wetland extent in Interior Alaska. Interior Alaska experiences the most rain  
460 events in autumn, mainly in August and September (Hinzman et al., 2006), which  
461 restores some of the extent of wetlands and leads to increases in  $\text{CH}_4$  emissions in August  
462 and early September. CarbonTracker successfully represented the restored wetland in  
463 August and September but not CLM4.5 (Fig. 3 and 4). The autumn emission period is  
464 very short and ends with the onset of winter, resulting in a strong drop in  $\text{CH}_4$  emissions  
465 in October.

466 The CLM4.5 underestimation of northern ( $> 68^\circ\text{N}$ ) Alaska site-level  $\text{CH}_4$   
467 emissions during the growing season at some sites is confirmed with comparison to  
468 CarbonTracker inversions (Fig. 3b). In southern and northern coastal Alaska, CLM4.5  
469 predicts a much shorter  $\text{CH}_4$  emission season and a smaller magnitude of  $\text{CH}_4$  emissions  
470 than CarbonTracker. The main season of strong underestimation by CLM4.5 is from May  
471 to July with the maximum underestimation of about 9.2 mg  $\text{CH}_4$  m<sup>-2</sup> day<sup>-1</sup> in June. The  
472 underestimated  $\text{CH}_4$  emissions occur with both  $F_{S+G}$  and  $F_{def}$  in the north of 68°N.  
473 During the cold season from October to April, CLM4.5 predictions with  $F_{S+G}$  or  $F_{def}$  are  
474 consistently smaller than CarbonTracker estimates across all the latitudes. The mean  
475 underestimation of cold season  $\text{CH}_4$  emission is less than 1 mg  $\text{CH}_4$  m<sup>-2</sup> day<sup>-1</sup>, which is  
476 much smaller than the underestimation we found compared to site level measurements.  
477 In comparison with CarbonTracker, CLM4.5 predicted 0.46±0.07Tg and 0.39±0.08Tg  
478 less Alaska wide  $\text{CH}_4$  emissions in cold season (October to April) with  $F_{S+G}$  and  $F_{def}$ ,  
479 respectively.

480 The CarbonTracker inversions suggest 21.9±3.2% of the annual Alaska  $\text{CH}_4$   
481 emissions occur during the cold season, while CLM4.5 predicts only 3.5±1.3% and  
482 8.3±3.0% (with  $F_{def}$  and  $F_{S+G}$ , respectively) occur during the cold season. When  
483 September and April are included in the “cold season”, the contribution is increased to  
484 45.3±4.5% by CarbonTracker, which is slightly smaller than the cold season contribution  
485 (50±9%) inferred from site-level (BEO2, BES, CMDL, ATQ and IVO) measurements  
486 (Zona et al., 2016). The September–April contributions to annual emissions predicted by  
487 CLM4.5 are 32.1±8.1% and 40.1±14.7% of the predicted annual emissions with  $F_{S+G}$  and  
488  $F_{def}$ , respectively. Although  $\text{CH}_4$  fluxes from the ocean surface are excluded, we cannot  
489 exclude some influence of coastal grid cells on the CarbonTracker estimates.

490 The atmospheric  $\text{CH}_4$  mole fraction enhancements calculated from CLM4.5  
491 predicted  $\text{CH}_4$  emissions are lower than the CARVE measured  $\text{CH}_4$  mole fraction  
492 enhancements (Fig. 5). However, in contrast to the emission underestimations that only  
493 occur from May to July, the monthly atmospheric  $\text{CH}_4$  mole fraction enhancements are  
494 underestimated throughout the year, with a maximum underestimation in August (Fig.



495 5a). The CARVE measured peak mole fraction enhancement due to surface CH<sub>4</sub>  
496 emissions is in August for both 2012 and 2013. Although CLM4.5 predicted the peak  
497 CH<sub>4</sub> mole fraction enhancement in August, 2012, predicted seasonal CH<sub>4</sub> mole fraction  
498 enhancements are much smaller in 2013 and peaks in September. The underestimation of  
499 cold season mole fraction CH<sub>4</sub> enhancements by CLM4.5 leads to 24.0±9.2 ppb and  
500 18.9±17.3 ppb lower CH<sub>4</sub> mole fraction enhancements in April and October 2013,  
501 respectively. From April to October, the two-year mean monthly atmospheric CH<sub>4</sub> mole  
502 fraction enhancements are underestimated by 15 ppb in WRF-STILT-CLM model  
503 predictions. The underestimation may not be attributed to anthropogenic CH<sub>4</sub> source  
504 because  excluded both observed and modeled CH<sub>4</sub> mole fraction enhancements when  
505 [CO]<sub>2</sub>>150 ppb, given that anthropogenic CH<sub>4</sub> mole fraction enhancements are  
506 consistently correlated to CO mole fraction enhancements (Zona et al., 2016). The large  
507 standard deviation of CARVE observed CH<sub>4</sub> mole fraction enhancements implies that the  
508 CH<sub>4</sub> emissions have large spatial and temporal variability. The CLM4.5 predictions are  
509 generally within the observed range of variation except in April and May in 2013.

510 The very low cold season CH<sub>4</sub> emission predictions at site and regional scales  
511 occurs because of the assumed temperature sensitivity for CH<sub>4</sub> production when the soil  
512 temperature of a given layer is at or below freezing (i.e., no CH<sub>4</sub> production occurs in that  
513 soil layer). The multi-layer structure of CLM4.5 can in principle generate CH<sub>4</sub> emissions  
514 deeper in the soil after the surface has frozen, though even then, modeled diffusion rates  
515 through frozen surface layers are low. Although the measurements show winter CH<sub>4</sub>  
516 emissions, it remains uncertain whether these emissions are from production at low  
517 temperature or residual CH<sub>4</sub> from the end of the growing season. Understanding which of  
518 these is occurring is important for diagnosing how to improve model representation of the  
519 processes responsible for the wintertime fluxes. The cold season underestimation by  
520 CLM4.5 is also partly attributed to the low wetland area during this period at high  
521 latitudes (currently,  $F_{def}$  is set to zero when snow is present). Given the current  
522 observations of CH<sub>4</sub> emissions during the cold season, we believe these two factors need  
523 to be re-evaluated in CLM4.5.

### 524 3.3 Interannual variation of CH<sub>4</sub> cycle

525 The CLM4.5 simulated Alaska CH<sub>4</sub> emissions using  $F_{def}$  are in very good  
526 agreement with CarbonTracker-CH<sub>4</sub> emission in the growing season but biased in the  
527 cold season (Fig. 6). The largest growing season discrepancies occur in 2006 and 2007.  
528 Bruhwiler et al. (2014) attributed the CarbonTracker 2007 CH<sub>4</sub> emission anomaly to  
529 warmer temperatures and higher than normal precipitation. However, the CRUNCEP  
530 reanalysis data we used to force CLM4.5 do not have a positive precipitation anomaly in  
531 either 2006 or 2007 (Fig. 7a). In contrast, there is a strong negative precipitation  
532 anomaly in 2007. The obvious wet years (2000, 2005, 2008, 2011 and 2012) in the  
533 CRUNCEP reanalysis data are not directly related to the predicted and measured wetland  
534 area anomaly or CH<sub>4</sub> emission anomaly. The mean air temperature in 2007 is only  
535 slightly higher than 2000-2012 mean air temperature (Fig. 7b). The correlation analysis  
536 implies that the model predicted interannual CH<sub>4</sub> variation is mainly explained by  
537 temperature variation (Fig. 8a,  $r=0.86$ ,  $P=0.0007$ ), followed by the default wetland extent  
538 ( $F_{def}$ ) variation (Fig. 8b,  $r=0.65$ ,  $P=0.03$ ), but weakly explained by SWAMPS-GLWD  
539 wetland extent ( $F_{S+G}$ ) variation ( $r=0.44$ ,  $P=0.17$ ) and precipitation variation ( $r=0.18$ ,





540  $P=0.58$ ). When the  $\text{CH}_4$  predictions are calculated with  $F_{S+G}$ , correlation between the  
541 interannual variation of  $\text{CH}_4$  and variation in  $F_{S+G}$  ( $r=0.18$ ,  $P=0.59$ ), precipitation ( $r=0.36$ ,  
542  $P=0.29$ ), and temperature ( $r=0.32$ ,  $P=0.33$ ) are substantially reduced. Interannual  
543 variation of  $\text{CH}_4$  emissions by CarbonTracker are not well correlated to SWAMPS-  
544 GLWD wetland extent variation ( $r=0.33$ ,  $P=0.32$ ), variations in CRUNCEP temperature  
545 ( $r=-0.23$ ,  $P=0.49$ ), or precipitation ( $r=-0.06$ ,  $P=0.86$ ).

#### 546 4 Concluding remarks

547 We implemented and tested needed changes to the estimate of aerenchyma area in  
548 CLM4.5. The modeled and measured  $\text{CH}_4$  emissions and enhancements in atmospheric  
549 mole fractions of  $\text{CH}_4$  are used to analyze the seasonal wetland  $\text{CH}_4$  emission cycle in  
550 Alaska. Both the measurements and model predictions show large latitudinal variability  
551 of  $\text{CH}_4$  seasonal cycles. At the site level, CLM4.5 generally captures the seasonality in  
552 growing season  $\text{CH}_4$  emissions. However, comparing eddy covariance  $\text{CH}_4$  observations  
553 with the model predictions is complicated by the unknown fraction of inundation in the  
554 footprint of the measurement tower, which may cause large variations in  $\text{CH}_4$  emission  
555 predictions. Measurements from the sites experiencing wintertime soil frost imply that  
556  $\text{CH}_4$  emissions continue in the cold season (October to April). The likely incorrect  
557 treatment of  $\text{CH}_4$  production under soil frost in CLM4.5 leads to underestimates of the  
558 wintertime emissions. This conclusion is confirmed by the discrepancies between  
559 CLM4.5 and CarbonTracker predictions, although the cold season discrepancies between  
560 CLM4.5 and CarbonTracker are much smaller than the discrepancies between CLM4.5  
561 and site-level measurements. The differences between the seasonality predicted by  
562 CLM4.5 and CarbonTracker vary with time and latitude, although the Alaska area-  
563 integrated  $\text{CH}_4$  emissions agree well. Besides the strength of wintertime  $\text{CH}_4$  emissions,  
564 the main discrepancies between CLM4.5 and CarbonTracker estimates are northern and  
565 southern coastal area  $\text{CH}_4$  emissions. The inundation area leads to uncertainties in  
566 predictions of seasonal and interannual variability of  $\text{CH}_4$  emissions, as has been  
567 concluded elsewhere. Compared with the CLM4.5 predicted inundation area, the  
568 aggregated  $F_{S+G}$  inundation led to smaller global  $\text{CH}_4$  emission biases than  $F_{def}$  (RMSE  
569 dropped from  $31 \text{ ng C m}^{-2} \text{ s}^{-1}$  to  $25 \text{ ng C m}^{-2} \text{ s}^{-1}$ ) between CLM4.5 and CarbonTracker. In  
570 contrast, the  $F_{S+G}$  inundation area increased seasonal emission biases in Alaska by  
571 increasing RMSE from 3 to  $4 \text{ mg CH}_4 \text{ m}^{-2} \text{ day}^{-1}$  compared with the CLM4.5 predicted  
572 inundation. The larger SWAMPS-GLWD inundation area leads to much stronger Alaska  
573 wide annual  $\text{CH}_4$  emissions compared to those calculated from the default predicted  
574 inundation area. CLM4.5 predictions show that the interannual variations of  $\text{CH}_4$   
575 emissions are correlated with the reanalysis air temperature and wetland extent variation.  
576 In contrast, interannual variation in CarbonTracker  $\text{CH}_4$  emissions is weakly related to  
577 interannual variation in SWAMPS-GLWD wetland area and reanalysis precipitation and  
578 temperature.

579 The CLM4.5  $\text{CH}_4$  module constrained from global total annual  $\text{CH}_4$  emissions  
580 does not accurately represent the seasonal cycles at the regional and site scale seasonal  
581 cycles due to large temporal and spatial heterogeneity in surface  $\text{CH}_4$  emissions and  
582 wetland extent. Further improving the  $\text{CH}_4$  biogeochemical model at the seasonal and  
583 annual time scales requires further extensive experiments to better understand climate  
584 controls on above- and below-ground physiological processes and how vegetation





585 controls gaseous transport (e.g. CH<sub>4</sub> production under low temperatures). Although cold  
586 season site-level measurements are rare, the large discrepancies in winter emissions  
587 between CLM4.5 and CarbonTracker predictions and site measurements indicate that  
588 studies on winter ecosystem activities and wetland evolution in high latitude would be  
589 valuable.

590

591

592 **Acknowledgements:** Funding for this study was provided by the US Department of  
593 Energy, BER, under the RGCM program and NGEE-Arctic project under contract # DE-  
594 AC02-05CH11231. We thank the CARVE flight group for efforts on CARVE science  
595 flights. CarbonTracker CH<sub>4</sub> results provided by NOAA ESRL, Boulder, Colorado, USA  
596 from the website at <http://www.esrl.noaa.gov>. The eddy covariance tower data used in  
597 this study were supported by the Division of Polar Programs of the National Science  
598 Foundation (NSF) (Award 1204263); Carbon in Arctic Reservoirs Vulnerability  
599 Experiment (CARVE), an Earth Ventures (EV-1) investigation, under contract with the  
600 National Aeronautics and Space Administration; and Department of Energy (DOE) Grant  
601 DE-SC005160. Logistical support was funded by the NSF Division of Polar Programs.  
602

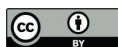603 **References**

- 604 Alavala, P. C. and Kirchoff, V. W. J. H.: Methane fluxes from the Pantanal floodplain in  
 605 Brazil: Seasonal variation, in: *Non-CO<sub>2</sub> Greenhouse Gases: Scientific understanding,*  
 606 *control and implementation*, edited by: Goossens, A., De Visscher, A., Boeckx, P., and  
 607 Van Cleemput, O., Kluwer Academic Publishers, Netherlands, 95–99, 2000.
- 608 Bartlett, K. B., Crill, P. M., Sass, R. L., Harriss, R. C., Dise, N. B.: Methane emissions  
 609 from tundra environments in the Yukon-Kuskokwim delta, Alaska, *J. Geophys. Res.*,  
 610 97D, 16645–16660, 1992.
- 611 Bergamaschi, P., Frankenberg, C., Meirink, J. F., Krol, M., Villani, M. G., Houweling, S.,  
 612 Dentener, F., Dlugokencky, E. J., Miller, J. B., Gatti, L. V., Engel, A., and Levin, I.:  
 613 Inverse modeling of global and regional CH<sub>4</sub> emissions using SCIAMACHY satellite  
 614 retrievals, *J. Geophys. Res.-Atmos.*, 114, D22301, doi:10.1029/2009JD012287, 2009.
- 615 Billings, W. D., Peterson, K. M., Shaver, G. R., Trent, A. W.: Root growth, respiration,  
 616 and carbon dioxide evolution in an Arctic tundra soil. *Arctic Alpine Res.*, 9, 129–137,  
 617 1977.
- 618 Bohn, T. J., Melton, J. R., Ito, A., Kleinen, T., Spahni, R., Stocker, B. D., Zhang, B., Zhu,  
 619 X., Schroeder, R., Glagolev, M. V., Maksyutov, S., Chen, G., Denisov, S. N., Eliseev,  
 620 A. V., Gallego-Sala, A., McDonald, K. C., Rawlins, M. A., Subin, Z. M., Tian, H.,  
 621 Zhuang, Q., Kaplan, J. O.: WETCHIMP-WSL:intercomparison of wetland methane  
 622 emissions models over West Siveria, *Biogeosciences*, 12, 3321-3349, 2015.
- 623 Brouchkov, A., Fukuda, M., Tomita, F., Asano, K., Tanaka, M.: Microbiology and gas  
 624 emission at low temperatures: some field and experimental results. *Tōhoku Geophys.*  
 625 *Journ.*, 36, 452-455, 2003.
- 626 Bruhwiler, L., Dlugokencky, E., Masarie, K., Ishizawa, M., Andrews, A., Miller, J.,  
 627 Sweeney, C., Tans, P., Worthy, D.: CarbonTracker-CH<sub>4</sub>: an assimilation system for  
 628 estimating emissions of atmospheric methane, *Atmos. Chem. Phys.*, 14, 8269-8293,  
 629 2014.
- 630 Bubier, J. L., Crill, P. M., Varner, R. K., and Moore, T. R.: BOREAS TGB-01/TGB-03  
 631 CH<sub>4</sub> chamber flux data: NSA Fen. Data set, available at: <http://www.daac.ornl.gov>,  
 632 Oak Ridge, TN, USA, 1998.
- 633 Chan, K. M., Wood, R.: The seasonal cycle of planetary boundary layer depth determined  
 634 using COSMIC radio occultation data, *J. Geophys. Res.-Atmos.*, 118, 12,422-12,434,  
 635 doi:10.1002/2013JD020147, 2013.
- 636 Chang, R. Y. W., Miller, C. E., Dinardo, S. J., Karion, A., Sweeney, C., Daube, B.,  
 637 Henderson, J. M., Mountain, M. E., Eluszkiewicz, J., Miller, J. B., Bruhwiler, L. M. P.,  
 638 Wofsy, S. C.: Methane emissions from Alaska in 2012 from CARVE airborne  
 639 observations. *Proc. Natl. Acad. Sci.*, 111, 16694-16699, 2014.
- 640 Chapin, F. S.: Morphological and physiological mechanisms of temperature  
 641 compensation in phosphate absorption along a latitudinal gradient, *Ecology*, 55, 1180-  
 642 1198, 1974.
- 643 Clein, J. S., Schimel, J. P.: Microbial activity of tundra and taiga soils at sub-zero  
 644 temperatures. *Soil. Biol. Biochem.*, 29(9), 1231-1234, 1995.
- 645 Clement, R. J., Verma, S. B., and Verry, E. S.: Relating Chamber Measurements to Eddy-  
 646 Correlation Measurements of Methane Flux, *J. Geophys. Res.-Atmos.*, 100, 21047–  
 647 21056, 1995.
- 648 Comas, X., Slater, L., Reeve, A.: Seasonal geophysical monitoring of biogenic gases in a  
 649 northern peatland: implications for temporal and spatial variability in free phase gas

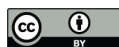

- 650 production rates, *J. Geophys. Res. Biogeosci.* 113, G01012,  
 651 doi:10.1029/2007JG000575, 2008.
- 652 Ding, W. X., Cai, Z. C., and Wang, D. X.: Preliminary budget of methane emissions from  
 653 natural wetlands in China, *Atmos. Environ.*, 38, 751–759,  
 654 doi:10.1016/J.Atmosenv.2003.10.016, 2004.
- 655 Dise, N. B.: Methane Emission from Minnesota Peatlands-Spatial and Seasonal  
 656 Variability, *Global Biogeochem. Cy.*, 7, 123–142, 1993.
- 657 Dunfield P, Knowles R, Dumont R, Moore TR. Methane production and consumption in  
 658 temperate and subarctic peat soils: Response to temperature and pH. *Soil Biol*  
 659 *Biochem* 1993; 25: 321–326.
- 660 Euskirchen, E. S., Bret-Harte, M. S., Scott, G. J., Edgar, C., Shaver, G. R.: Seasonal  
 661 patterns of carbon dioxide and water fluxes in three representative tundra ecosystems  
 662 in northern Alaska, *Ecosphere*, 1-19, 2012.
- 663 Granberg, G., Ottosson-Lofvenius, M., Grip, H., Sundh, I., and Nilsson, M.: Effect of  
 664 climatic variability from 1980 to 1997 on simulated methane emission from a boreal  
 665 mixed mire in northern Sweden, *Global Biogeochem. Cycles*, 15, 977–991, 2001.
- 666 Harazono, Y., Mano, M., Miyata, A., Yoshimoto, M., Zulueta, R. C., Vourlitis, G.L.,  
 667 Kwon, H., Oechel, W.: Temporal and spatial differences of methane flux at arctic  
 668 tundra in Alaska, *Natl Inst. Polar Res, Spec. Issue*, 59:79–95, 2006.
- 669 Hargreaves, K. J., Fowler, D., Pitcairn, C. E. R. and Aurela, M.: Annual methane  
 670 emission from Finnish mires estimated from eddy covariance campaign  
 671 measurements, *Theor. Appl. Climatol.* 70, 203–213, 2001.
- 672 Henderson, J. M., Eluszkiewicz, J., Mountain, M. E., Nehr Korn, T., Chang, R. Y.-W.,  
 673 Karion, A., Miller, J. B., Sweeney, C., Steiner, N., Wofsy, S. C., Miller, C. E.,  
 674 Atmospheric transport simulations in support of the Carve in Arctic Reservoirs  
 675 Vulnerability Experiment (CARVE), *Atmos. Chem. Phys.*, 15,4093–4116, 2015.
- 676 Hinzman, L.D., L. A. Viereck, P. Adams, V. E. Romanovsky, and K. Yoshikawa, 2006.  
 677 Climate and permafrost dynamics of the Alaskan boreal forest. In *Alaska's changing*  
 678 *boreal forest*. Edited by F.S. Chapin III, M.W. Oswood, K Van Cleve, L.A. Viereck,  
 679 and D.L. Verbyla. Oxford University Press, New York. pp. 39-61.
- 680 Hommeltenberg, J., Mauder, M., Drösler, M., Heidbach, K., Werle, P., Schmid, H. P.:  
 681 Ecosystem scale methane fluxes in a natural temperature bog-pine forest in southern  
 682 Germany, *Biogeosciences*, 11, 3477-3493, 2014.
- 683 Hugelius, G., Strauss, J., Zubrzycki, S., Harden, J. W., Schuur, E. A. G., Ping, C.-L.,  
 684 Schirmermeister, L., Grosse, G., Michaelson, G. J., Koven, C. D., O'Donnell, J. A.,  
 685 Elberling, B., Mishra, U., Camill, P., Yu, Z., Palmtag, J., Kuhry, P.: Estimated stocks  
 686 of circumpolar permafrost carbon with quantified uncertainty ranges and identified  
 687 data gaps, *Biogeosciences*, 11, 6573-6593, 2014.
- 688 IPCC: *Climate Change 2007: The Physical Science Basis. Contribution of Working*  
 689 *Group I to the Fourth Assessment Report of the IPCC*, edited by: Solomon, S., Qin, D.,  
 690 Manning, M., Chen, Z., Marquis, M., Averyt, K. B., Tignor, M., and Miller, H. L.,  
 691 Cambridge University Press, Cambridge, United Kingdom and New York, 2007.
- 692 Iversen, C. M., Sloan, V. L., Sullivan, P. F., Euskirchen, E. S., McGuire, A. D., Norby, R.  
 693 J., Walker, A. P., Warren, J. M., Wullschlegel, S. D.:The unseen iceberg: plant roots  
 694 in arctic tundra, *New Phytologist*, 205, 34-59, doi: 10.1111/nph.13003, 2015.
- 695 Iwata, H., Harazono, Y., Ueyama, M., Sakabe, A., Nagano, H., Kosugi, Y., Takahashi, K.,

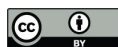

- 696 Kim, Y.: Methane exchange in a poorly-drained black spruce forest over permafrost  
 697 observed using the eddy covariance technique, *Agric. For. Meteorol.*, 214-215, 157-  
 698 168 2015.
- 699 Jackowicz-Korczyński, M., Christensen, T. R., Bäckstrand, K., Crill, P., Friborg, T.,  
 700 Mastepanov, M., Ström, L.: Annual cycle of methane emission from a subarctic  
 701 peatland, *J. Geophys. Res.*, 115, G02009, doi:10.1029/2008JG000913, 2010.
- 702 Juutinen, S., Alm, J., Larmola, T., Huttunen, J. T., Morero, M., Martikainen, P. J.,  
 703 Silvola, J.: Major implication of the littoral zone for methane release from boreal  
 704 lakes, *Global Biogeochem. Cycles*, 17, 1117.10.1029/2003GB002105, 2003.
- 705 Karl, D. M., Tilbrook, B. D.: Production and transport of methane in oceanic particulate  
 706 organic matter, *Nature*, 368, 732-734, 1994.
- 707 Keller, M. M.: Biological sources and sinks of methane in tropical habitats and tropical  
 708 atmospheric chemistry, Princeton University, 1990.
- 709 King, J. Y., William, S. R., Shannon K. R.: Methane emission and transport by arctic  
 710 sedges in Alaska: results of a vegetation removal experiment, *J. Geophys. Res.*, 103,  
 711 29083-29092.
- 712 Kirschke, S., Bousquet, P., Ciais, P., Saunio, M., Canadell, J. G., Dlugokencky, E. J.,  
 713 Bergamaschi, P., Bergmann, D., Blake, D. R., Bruhwiler, L., Cameron Smith, P.,  
 714 Castaldi, S., Chevallier, F., Feng, L., Fraser, A., Heimann, M., Hodson, E. L.,  
 715 Houweling, S., Josse, B., Fraser, P. J., Krummel, P. B., Lamarque, J., Langenfelds, R.  
 716 L., Le Quére, C., Naik, V., O'Doherty, S., Palmer, P. I., Pison, I., Plummer, D.,  
 717 Poulter, B., Prinn, R. G., Rigby, M., Ringeval, B., Santini, M., Schmidt, M., Shindell,  
 718 D. T., Simpson, I. J., Spahni, R., Steele, L. P., Strode, S. A., Sudo, K., Szopa, S., van  
 719 der Werf, G. R., Voulgarakis, A., van Weele, M., Weiss, R. F., Williams, J. E., and  
 720 Zeng, G.: Three decades of global methane sources and sinks, *Nat. Geosci.*, 6, 813–  
 721 823, doi: 10.1038/ngeo1955, 2013.
- 722 Koh, H. S., Ochs, C. A., and Yu, K. W.: Hydrologic gradient and vegetation controls on  
 723 CH<sub>4</sub> and CO<sub>2</sub> fluxes in a spring-fed forested wetland, *Hydrobiologia*, 630, 271–286,  
 724 doi:10.1007/S10750-009-9821-X, 2009.
- 725 Koven, C. D., Riley, W. J., Subin, Z. M., Tang, J. Y., Torn, M. S., Collins, W. D., Bonan,  
 726 G. B., Lawrence, D. M., Swenson, S. C.: The effects of vertically resolved soil  
 727 biogeochemistry and alternate soil C and N models on C dynamics of CLM4,  
 728 *Biogeosciences*, 10, 7109-7131, 2013.
- 729 Kummerow, J., Russell, M.: Seasonal root growth in the Arctic tussock tundra, *Oecologia*,  
 730 47: 196–199, 1980.
- 731 Lupascu, M., Wadham, J. L., Hornibrook, E. R. C., Pancost, R. D.: Temperature  
 732 sensitivity of methane production in the permafrost active layer at Stordalen, Sweden:  
 733 A comparison with non-permafrost northern wetlands, *Arct., Antarc., Alp. Res.*, 44(4),  
 734 469-482, 2012.
- 735 Mastepanov, M., Sigsgaard, C., Tagesson, T., Ström, L., Tamstorf, M. P., Lund, M.,  
 736 Christensen, T. R.: Revisiting factors controlling methane emissions from high-arctic  
 737 tundra, *Biogeosciences*, 10, 5139-5158, 2013.
- 738 Mastepanov, M., Sigsgaard, C., Dlugokencky, E. J., Houweling, S., Ström L., Tamstorf,  
 739 M. P., and Christensen, T. R.: Large tundra methane burst during onset of freezing,  
 740 *Nature*, 456, 628–631, 2008.



- 741 Mao, J., Shi, X., Thornton, P. E., Hoffman, F. M., Zhu, Z., Myneni, R. B., Global  
 742 latitudinal-asymmetric vegetation growth trends and their driving mechanisms:2982-  
 743 2009, *Remote Sens.*, 5 1484-1497, 2013.
- 744 McEwing, K. R., Fisher, J. P., Zona, D.: Environmental and vegetation controls on the  
 745 spatial variability of CH<sub>4</sub> emission from wet-sedge and tussock tundra ecosystem in  
 746 the Arctic, *Plant Soil*, 388, 37-52, 2015.
- 747 Melton, J. R., Wania, R., Hodson, E. L., Poulter, B., Ringeval, B., Spahni, R., Bohn, T.,  
 748 Avis, C. A., Beerling, D. J., Eliseev, A.V., Denisov, S. N., Hopcroft, P. O.,  
 749 Lettenmaier, D. P., Riley, W. J., Singarayer, J. S., Subin, Z. M., Tian, H., Zürcher,  
 750 Brovkin, V., van Bodegom, P. M., Kleinen, T., Yu, Z. C., Kaplan, J. O., Present state  
 751 of global wetland extent and wetland methane modeling: conclusions from a model  
 752 inter-comparison project (WETCHIMP), *Biogeosciences*, 10, 753–788,2013.
- 753 Meng, L., Hess, P. G. M., Mahowald, N. M., Yavitt, J. B., Riley, W. J., Subin, Z. M.,  
 754 Lawrence, D. M., Swenson, S. C., Jauhiainen, J., and Fuka, D. R.: Sensitivity of  
 755 wetland methane emissions to model assumptions: application and model testing  
 756 against site observations, *Biogeosciences*, 9, 2793–2819, doi:10.5194/bg-9-2793-  
 757 2012, 2012.
- 758 Mialon, A., Royer, A., Fily, M.: Wetland seasonal dynamics and interannual variability  
 759 over northern high latitudes, derived from microwave satellite data, *J. Geophys. Res.*,  
 760 110, D17102, doi:10.1029/2004JD005697, 2005.
- 761 Moosavi, S. C., Crill, P. M., Pullman, E. R., Funk, D. W., Peterson, K. M.: Controls on  
 762 CH<sub>4</sub> flux from an Alaskan boreal wetland, *Global Biogeochem. Cycles*, 10, 287-296,  
 763 1996.
- 764 Morin, T. H., Bohrer, G., Naor-Azrieli, L., Mesi, S., Kenny, W. T., Mitsch, W. J.,  
 765 Schäfer, K. V. R.: The seasonal and diurnal dynamics of methane flux at a created  
 766 urban wetland. *Ecol. Engin.*, 72, 74-83, 2014.
- 767 Nakano, T., Kuniyoshi, S., Fukuda, M.: Temporal variation in methane emission from  
 768 tundra wetlands in a permafrost area, northeastern Siberia. *Atmos. Environ.*, 34, 1205–  
 769 1213, 2000.
- 770 Olivas, P. C., Oberbauer, S. F., Tweedie, C., Oechel, W. C., Lin, D., Kuchy, A.: Effects  
 771 of Fine-Scale Topography on CO<sub>2</sub> Flux Components of Alaskan Coastal Plain Tundra:  
 772 Response to Contracting Growing Seasons, *Arct. Antarct. Alpine Res.*, 43, 256–266,  
 773 doi: 10.1657/1938-4246-43.2.256, 2011.
- 774 Peters, W., Jacobson, A. R., Sweeney, C., Andrews, A. E., Conway, T. J., Masarie, K.,  
 775 Miller, J. B., Bruhwiler, L. M. P., Petron, G., Hirsch, A., Worthy, D. E. J., van der  
 776 Werf G. R., Randerson, J. T., Wennberg, P. O., Krol, M. C., Tans, P. P.: An  
 777 Atmospheric perspective on north American carbon dioxide exchange:  
 778 CarbonTracker, *PNAS*, 18925-18930, 2007.
- 779 Pickett-Heaps, C. A., Jacob, D. J., Wecht, K. J., Kort, E. A., Wofsy, S. C., Diskin, G. S.,  
 780 Worthy, D. E. J., Kaplan, J. O., Drevet, J.: Magnitude and seasonality of wetland  
 781 methane emissions from the Hudson Bay Lowlands (Canada), *Atmos. Chem. Phys.*,  
 782 11, 3773-3779, 2011.
- 783 Prigent, C., F. Papa, F. Aires, W. B. Rossow, E. Matthews.: Global inundation dynamics  
 784 inferred from multiple satellite observations, 1993-2000, *J. Geophys. Res.-Atmos.*,  
 785 112, D12107, doi:10.1029/2006JD007847, 2007.
- 786 Qian, T. T., Dai, A., Trenberth, K. E., and Oleson, K. W.: Simulation of global land

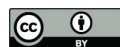

- 787 surface conditions from 1948 to 2004. Part I: Forcing data and evaluations, J.  
788 Hydrometeorol., 7, 953–975, 2006.
- 789 Riley, W. J., Subin, Z. M., Lawrence, D. M., Swenson, S. C., Torn, M. S., Meng, L.,  
790 Mahowald, N. M., Hess, P.: Barriers to predicting changes in global terrestrial  
791 methane fluxes: analyses using CLM4Me, a methane biogeochemistry model  
792 integrated in CESM, Biogeosciences, 8, 1025-1953, 2011.
- 793 Ringeval, B., de Noblet-Ducoudré, N., Ciais, P., Bousquet, P., Prigent, C., Papa, F.,  
794 Rossow, W. B.: An attempt to quantify the impact of changes in wetland extent on  
795 methane emissions on the seasonal and interannual time scales, Global Biogeochem.  
796 Cycles, 24, GB2003, doi:10.1029/2008GB003354, 2010.
- 797 Rinne, J., Riutta, T., Pihlatie, M., Aurela, M., Haapanala, S., Tuovinen, J., Tuittila, E.:  
798 Annual cycle of methane emission from a boreal fen measured by the eddy Covance  
799 technique., Tellus, 59B, 449-457, 2007.
- 800 Roulet, N. T., Ash, R., Moore, T.R.: Low boreal wetlands as a source of atmospheric  
801 methane, J. Geophys. Res., 97 (D4), 3739-3749, 1992.
- 802 Saarnio, S., Alm, J., Silvola, J., Lohila, A., Nykanen, H., and Martikainen, P. J.: Seasonal  
803 variation in CH<sub>4</sub> emissions and production and oxidation potentials at microsites on an  
804 oligotrophic pine fen, Oecologia, 110, 414–422, 1997.
- 805 Schroeder, R., McDonald K. C., Champan, B.D., Jensen, K., Podest, E., Tessler, Z. D.,  
806 Bohn, T. J., Zimmermann, R.: Development and evaluation of a multi-year fractional  
807 surface water data set derived from active/passive microwave remote sensing data, 7,  
808 16688-16732, 2015.
- 809 Schütz, H., Seiler, W., Conrad, R.: Influence of soil-temperature on methane emission  
810 from rice paddy fields, Biogeochemistry, 11, 77–95, 1990.
- 811 Segers, R.: Methane production and methane consumption: a review of process  
812 underlying wetland methane fluxes, Biogeochemistry, 41, 23-51, 1998.
- 813 Shannon, R. D. and White, J. R.: 3-Year Study of Controls on Methane Emissions from 2  
814 Michigan Peatlands, Biogeochemistry, 27, 35–60, 1994.
- 815 Siavoshi., M., Dastan, S., Yassari, E., Laware, S. L.: Role of organic fertilizers on  
816 morphological and yield parameters in rice ( *Oryza sativa* L.), Intl. J. Agron. Plant  
817 Prod., 4, 1220-1225, 2013.
- 818 Sloan, V.: Plant roots in Arctic ecosystems: stocks and dynamics and their coupling to  
819 aboveground parameters, *PhD Thesis. University of Sheffield*, Sheffield, UK, 2011.
- 820 Smith, L. K., Lewis, W. M., Chanton, J. P., Cronin, G., and Hamilton, S. K.: Methane  
821 emissions from the Orinoco River floodplain, Venezuela, Biogeochemistry, 51, 113–  
822 140, 2000.
- 823 Song, C., Xu, X., Sun, X., Tian, H., Sun, L., Miao, Y., Wang, X., Guo, Y.: Large  
824 methane emission upon spring thaw from natural wetlands in the northern permafrost  
825 region, Environ. Res. Lett., 7, 034009, doi:10.1088/1748-9326/7/3/034009, 2012.
- 826 Starr, G., Oberbauer, S., Ahlquist, L.: The photosynthetic response of Alaskan tundra  
827 plants to increased season length and soil warming, Arct. Antarct. Alp. Res. 40(1),  
828 181–191, 2008.
- 829 Sturtevant, C. S., Oechel, W. C., Zona, D., Kim, Y., and Emerson, C. E.: Soil moisture  
830 control over autumn season methane flux, arctic coastal plain of Alaska,  
831 Biogeosciences, 9, 1423–1440, 2012.





- 832 Sullivan, P. F., Welker, J. M.: Warming chambers stimulate early season growth of an  
833 arctic sedge: results of a minirhizotron field study, *Oecologia*, 142, 616-626, 2005.
- 834 Svensson, B. H., Christensen, T. R., Johansson, E., and Oquist, M.: Interdecadal changes  
835 in CO<sub>2</sub> and CH<sub>4</sub> fluxes of a subarctic mire: Stordalen revisited after 20 years, *Oikos*, 85,  
836 22–30, 1999.
- 837 Tian, Y., Dickinson, R. E., Zhou, L., Zeng, X., Dai, Y., Myneni, R. B., Knyazikhin, Y.,  
838 Zhang, X., Friedl, M., Yu, H., Wu, W., Shaikh, M.: Comparison of seasonal and  
839 spatial variations of leaf area index and fraction of absorbed photosynthetically active  
840 radiation from Moderate Resolution Imaging Spectroradiometer (MODIS) and  
841 Common Land Model, *J. Geophys. Res.*, 109, D01103, doi:10.1029/2003JD003777,  
842 2004.
- 843 Tokida, T., Mizoguchi, M., Miyazaki, T., Kagemoto, A., Nagata, O., Hatano, R.:  
844 Episodic release of methane bubbles from peatland during spring thaw, *Chemosphere*,  
845 70, 165-171, 2007.
- 846 Torn, M. S., and Chapin III, F. S.: Environmental and biotic controls over methane flux  
847 from arctic tundra, *Atmos. Environ.*, 32, 3201–3218, 1993.
- 848 van Fischer, J. C., Rhew, R. C., Ames, G. M., Fosdick, B. K., von Fischer, P. E.:  
849 Vegetation height and other controls of spatial variability in methane emissions from  
850 the Arctic coastal tundra at Barrow, Alaska, *J. Geophys. Res.*, 115, G00I03,  
851 doi:10.1029/2009JG001283, 2010
- 852 van Hulzen J.B., Segers, R., van Bodegom, P. M., Leffelaar, P.A.: Temperature effects on  
853 soil methane production: and explanation for observed variability, *Soil Biol. and*  
854 *Biochem.*, 31, 1919-1929, 1999.
- 855 van Winden, J. F., Reichart, G.-J., McNamara, N. P., Benthien, A., Damsté, J. S. S.:  
856 Temperature-induced increase in methane release from peat bogs: a mesocosm  
857 experiment, *PLoS ONE* 7(6): e39614. doi:10.1371/journal.pone.0039614, 2012.
- 858 Verma, A., Arkebauer, T. J., and Valentine, D.: BOREAS TF-11 CO<sub>2</sub> and CH<sub>4</sub> flux data  
859 from the SSA-Fen. Data set, available at: <http://www.daac.ornl.gov>, Oak Ridge, TN,  
860 USA, 1998.
- 861 Walter, K. M., Zimov, S. A., Chanton, J. P., Verbyla, D., Chapin III, F. S.: Methane  
862 bubbling from Siberian thaw lakes as a positive feedback to climate warming, *Nature*,  
863 443, 71-75, doi: 10.1038/nature0504, 2006.
- 864 Wang, C., Xiao, S., Li, Y., Zhong, H., Li, X., Peng, P.: Methane formation and  
865 consumption processes in Xiangxi Bay of the Three Gorges Reservoir, *Sci. Rep.* 4,  
866 444, doi:10.1038/srep04449, 2014.
- 867 Wania, R., Ross, I., and Prentice, I. C.: Implementation and evaluation of a new methane  
868 model within a dynamic global vegetation model: LPJ-WHyMe v1.3.1, *Geosci. Model*  
869 *Dev.*, 3, 565–584, doi:10.5194/gmd-3-565-2010, 2010.
- 870 Wassmann, R., Thein, U. G., Whiticar, M. J., Rennenberg, H., Seiler, W., and Junk, W. J.:  
871 Methane emissions from the Amazon floodplain: Characterization of production and  
872 transport, *Global Biogeochem. Cy.*, 6, 3–13, 1992.
- 873 Whalen, S. C., Reeburgh, W. S.: Consumption of atmospheric methane by tundra soils,  
874 *Nature*, 342, 160–162, 1990.
- 875 Whalen, S. C. and Reeburgh, W. S.: Interannual variations in tundra methane emission: a  
876 4-year time series at fixed sites., *Global Biogeochem. Cy.*, 6, 139–159, 1992.

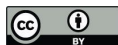

- 877 Whiting, G. J., Chanton, J. P.: Greenhouse carbon balance of wetlands: Methane  
878 emission versus carbon sequestration, *Tellus*, 53B, 521-528, 2001.
- 879 Wickland, K. P., Striegl, R. G., Schmidt, S. K., Mast, M. A.: Methane flux in subalpine  
880 wetland and unsaturated soils in the southern Rocky Mountains, *Global Biogeochem.*  
881 *Cycles*, 13, 101–113, 1999.
- 882 Wilson, J. O., Crill, P. M., Bartlett, K. B., Sebacher, D. I., Harriss, R. C., Sass, R. L.:  
883 Seasonal variation of methane emissions from a temperate swamp, *Biogeochemistry*,  
884 8, 55-71, 1998.
- 885 Yvon-Durocher, G., Montoya, J. M., Woodward, G., Jones, J. I., Trimmer, M.: Warming  
886 increases the proportion of primary production emitted as methane from freshwater  
887 mesocosms, *Global Chang. Biol.*, 17, 1225-1234, 2011.
- 888 Yvon-Durocher, G., Allen, A. P., Bastviken, D., Conrad, R., Gudas, C., St-Pierre, A.,  
889 Thanh-Duc, N., del Giorgio, P. A.: Methane fluxes show consistent temperature  
890 dependence across microbial to ecosystem scale, *Nature*, 507, 488-491, 2014.
- 891 Zhuang, Q., Melillo, J. M., Kicklighter, D. W., Prinn, R. G., McGuire, A. D., Steudler, P.  
892 A., Felzer, B. S., and Hu, S.: Methane fluxes between terrestrial ecosystems and the  
893 atmosphere at northern high latitudes during the past century: A retrospective analysis  
894 with a process based biogeochemistry model, *Glob. Biogeochem. Cycles*, 18,  
895 GB3010, doi:3010.1029/2004GB002239, 2004.
- 896 Zona, D., Oechel, W. C., Kochendorfer, J., Paw U, Salyuk, A. N., Olivas, P. C.,  
897 Oberbauer, S. F., Lipson, D. A.: Methane fluxes during the initiation of a large-scale  
898 water table manipulation experiment in the Alaskan Arctic tundra, *Global*  
899 *Biogeochem. Cycle* 23, GB2013, doi:10.1029/2009GB003487, 2009.
- 900 Zona, D., Gioli, B., Commane, R., Lindaas, J., Wofsy, S. C., Miller, C. E., Dinardo, S. J.,  
901 Dengel, S., Sweeney, C., Karion, A., Chang, R.Y.-W., Henderson, J. M., Murphy, P.  
902 C., Goodrich, J. P., Moreaux, V., Liljedahl, A., Watts, J. D., Kimball, J. S., Lipson, D.  
903 A., Oechel, W. C.: Cold season emissions dominate the Arctic tundra methane budget,  
904 *PNAS*, 113,40-45, 2016.

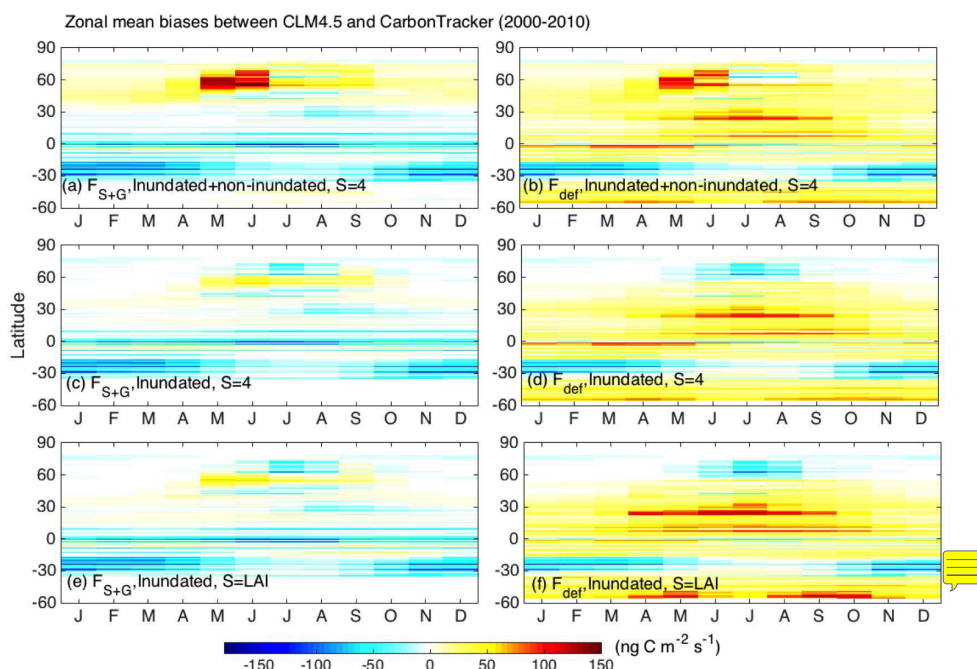

Fig. 1. Zonal mean biases of CH<sub>4</sub> emissions between CLM4.5 predictions and CarbonTracker (CH<sub>4</sub>\_CLM4.5-CH<sub>4</sub>\_CarbonTracker) with SWAMPS-GLWD ( $F_{S+G}$ ) and CLM4.5 predicted ( $F_{def}$ ) inundation fraction: CLM4.5 predictions of both inundated and noninundated emissions with  $F_{S+G}$  (a) and  $F_{def}$  (b), while aerechyma area is corrected with  $S=4$ ; CLM4.5 predictions of inundated emissions only with  $F_{S+G}$  (c) and  $F_{def}$  (d), while aerechyma area is corrected with  $S=4$ ; CLM4.5 predictions of inundated emissions only with  $F_{S+G}$  (e) and  $F_{def}$  (f), while aerechyma area is parameterized by default  $S=LAI$ .

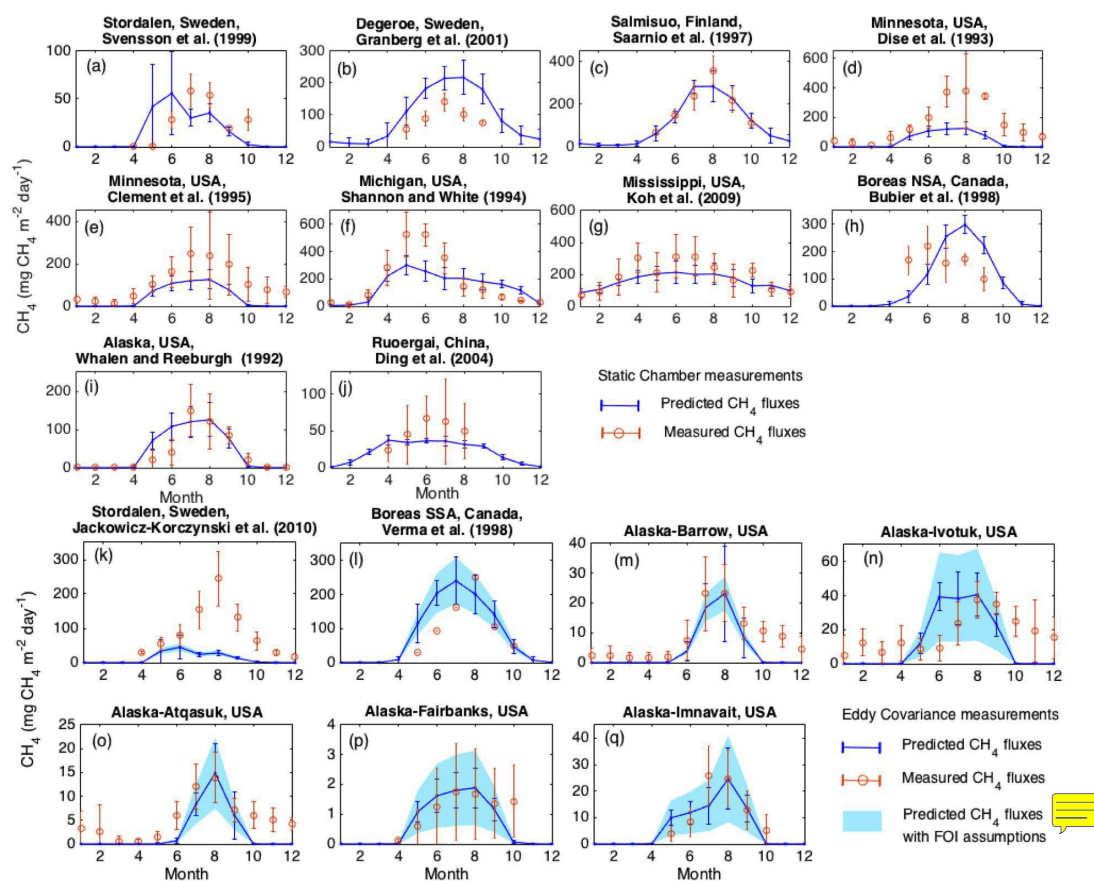

Fig. 2. Comparison of monthly mean simulated net  $\text{CH}_4$  flux between 2000 and 2012 and observed monthly mean net  $\text{CH}_4$  emissions in measurement year(s). The site measurements with static chamber are shown in (a-j) and measurements with eddy covariance (EC) towers are shown in (k-q). The error bars are standard deviation of monthly mean. The measurements with EC tower are weighted with a range of inundation fraction based on best estimates available: Stordalen: 80-100%; Boreas SSA: 50-90%; Alaska-Barrow: 60-100%, Alaska-Atqasuk: 10-30%; Alaska-Ivotuk: 5-25%; Alaska-Fairbanks: 0.5-2.5%, Alaska-IMN: 5-25%. Detailed description of the sites and measurements are shown in Table S1.

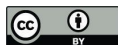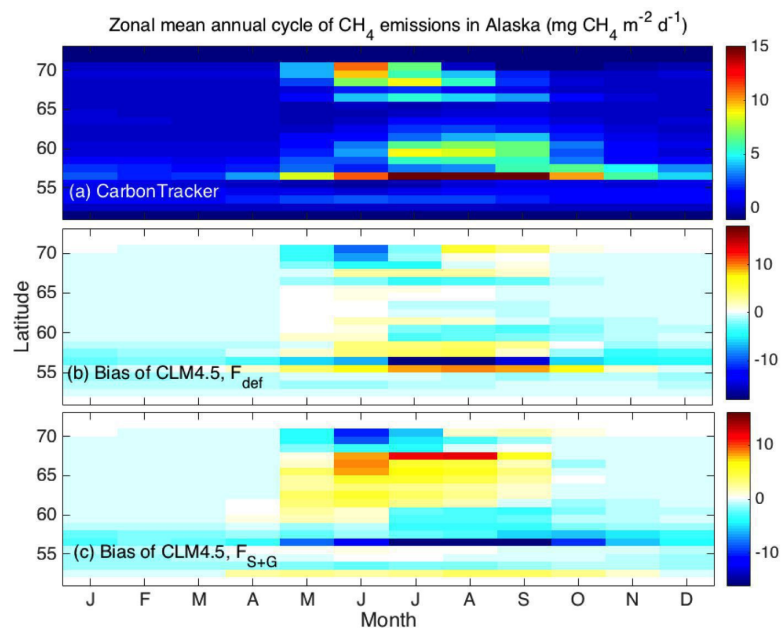

Fig. 3. The 2000-2010 zonal mean annual cycle of CH<sub>4</sub> emission (mg CH<sub>4</sub> m<sup>-2</sup> day<sup>-1</sup>) across Alaska predicted by CarbonTracker (a), and biases of CLM4.5 with CLM4.5 predicted inundation fraction ( $F_{def}$ ) (b) and SWAMPS-GLWD inundation fraction ( $F_{S+G}$ ) (c). The 0.5°×0.5° CLM4.5 is regridded to 1°×1° to be consistent with CarbonTracker.

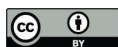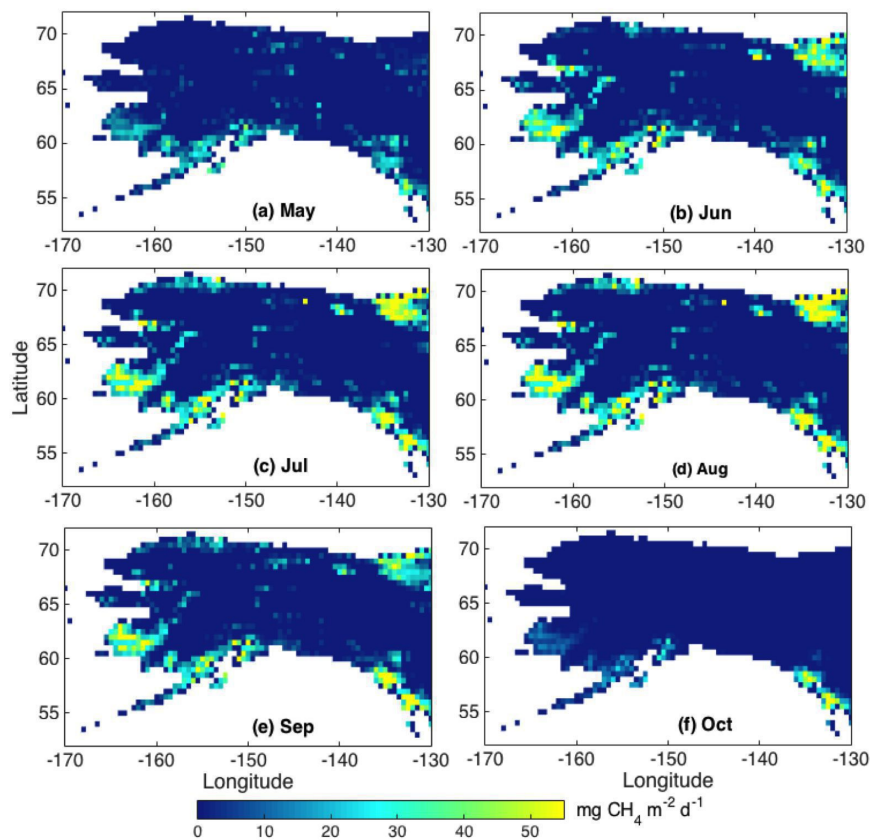

Fig. 4. CLM4.5 simulated mean monthly CH<sub>4</sub> emissions with  $F_{def}$  across years 2000-2012.



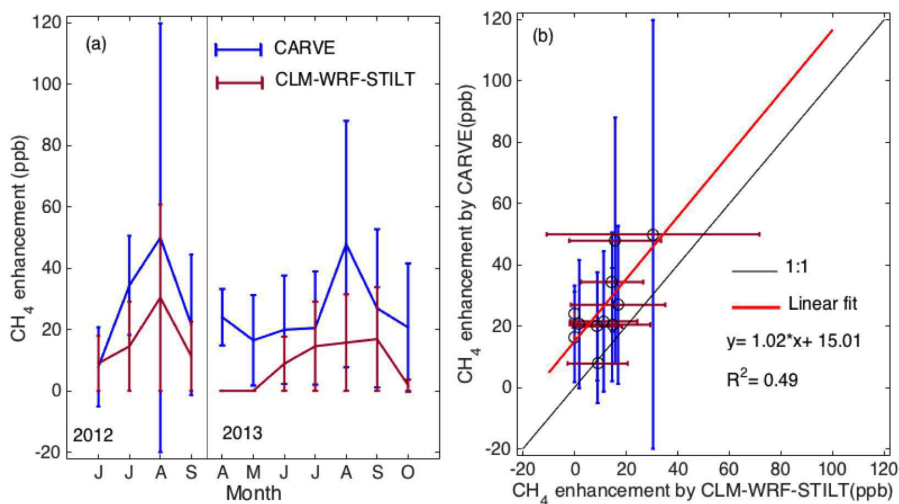

Fig. 5. The monthly mean atmospheric mole fraction enhancements in CH<sub>4</sub> estimated by WRF-STILT-CLM4.5 and CARVE measurements. (a) Observed and simulated monthly CH<sub>4</sub> mole fraction enhancements in 2012 and 2013; (b) Linear regression of measured versus modeled CH<sub>4</sub> mole fraction enhancements. The error bars are standard deviation of monthly mean.

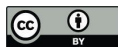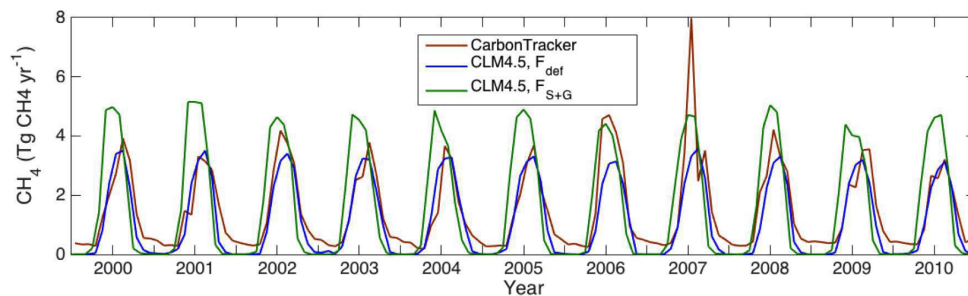

Fig. 6. Time variation of integrated  $\text{CH}_4$  ( $\text{Tg CH}_4 \text{ yr}^{-1}$ ) emissions from Alaska by CarbonTracker (brown), CLM4.5 with internally-predicted fraction of inundation  $F_{def}$  (blue) and CLM4.5 SWAMPS-GLWD fraction of inundation  $F_{S+G}$  (green).

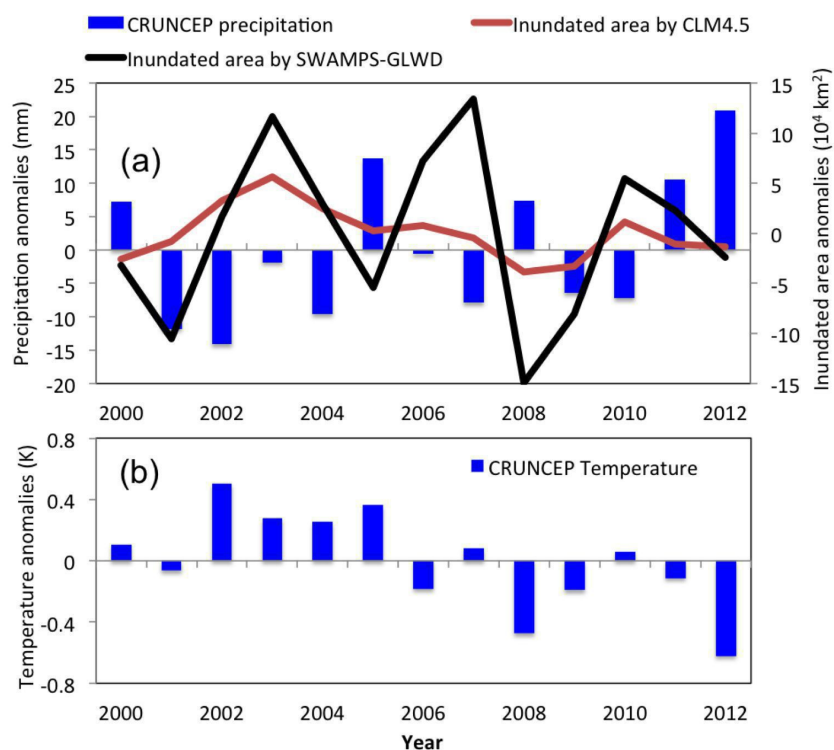

Fig. 7. The anomalies of annual precipitation and inundated area in Alaska (a) and the anomalies of annual mean temperature (b). The anomalies are calculated by subtracting the average between 2000-2012.

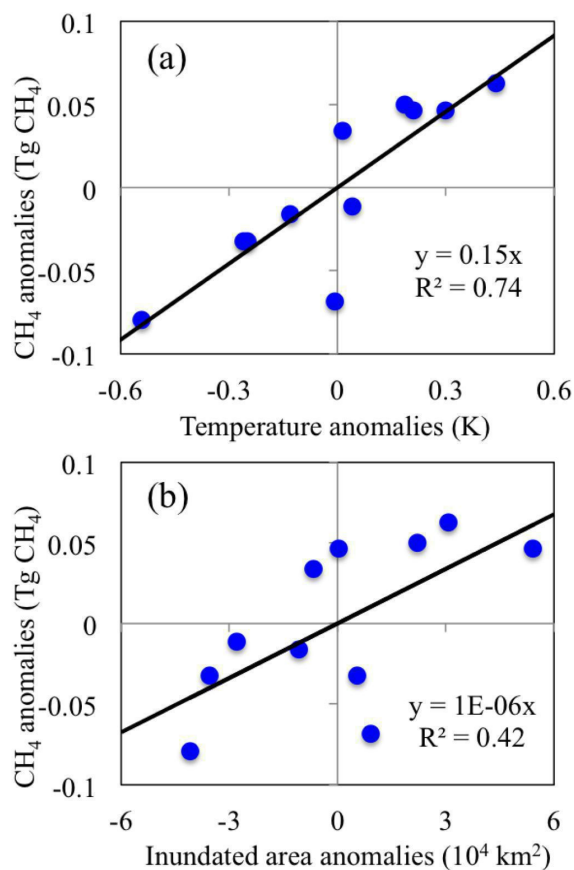

Fig. 8. The correlation between CLM-predicted annual CH<sub>4</sub> emission anomalies and mean annual temperature anomalies (a) and correlation between annual CH<sub>4</sub> emission anomalies and predicted inundated area anomalies during 2000-2010. The anomalies are calculated by subtracting the average between 2000-2010.
